# Supplementary material for: Kupyaphores are zinc homeostatic metallophores required for colonization of Mycobacterium tuberculosis
Source: PubMed Central journal article supplement — Proc Natl Acad Sci U S A. 2022 Feb 22;119(8):e2110293119. doi: 10.1073/pnas.2110293119 (PMC8872721; doi:10.1073/pnas.2110293119), 2022-02-22
Supplement: pnas.2110293119.sapp.pdf [file pnas.2110293119.sapp.pdf]

1  
2 **Supplementary Information for**

3  
4 **Kupyaphores are zinc homeostatic metallophores**  
5 **required for colonization of *Mycobacterium tuberculosis***

6  
7  
8 Kritee Mehdiratta<sup>1, 2</sup>, Shubham Singh<sup>3</sup>, Sachin Sharma<sup>4</sup>, Rashmi S. Bhosale<sup>4</sup>, Rahul  
9 Choudhury<sup>5</sup>, Dattatraya P. Masal<sup>5</sup>, Alzu Manocha<sup>4</sup>, Bhushan Dilip Dhamale<sup>4</sup>, Naseem  
10 Khan<sup>6</sup>, Vivekanand A. <sup>1, 2</sup>, Pooja Sharma<sup>1, 2</sup>, Melanie Ikeh<sup>7%</sup>, Amanda C. Brown<sup>7\$</sup>, Tanya  
11 Parish<sup>7^</sup>, Anil Ojha<sup>8, 9</sup>, Joy Sarojini Michael<sup>10</sup>, Mohammed Faruq<sup>1, 2</sup>, Guruprasad R.  
12 Medigeshi<sup>6</sup>, Debasisa Mohanty<sup>4</sup>, D. Srinivasa Reddy<sup>5</sup>, Vivek T. Natarajan<sup>1, 2</sup>, Siddhesh S.  
13 Kamat<sup>3\*</sup>, Rajesh S. Gokhale<sup>4\*</sup>

14  
15 Corresponding authors\*: Rajesh S. Gokhale and Siddhesh S. Kamat  
16 **Email:** [rsg@nii.ac.in](mailto:rsg@nii.ac.in); [siddhesh@iiserpune.ac.in](mailto:siddhesh@iiserpune.ac.in)

17  
18  
19 **This PDF file includes:**

20  
21 Figures S1 to S9  
22 SI Tables  
23 SI Methods  
24 SI References

25

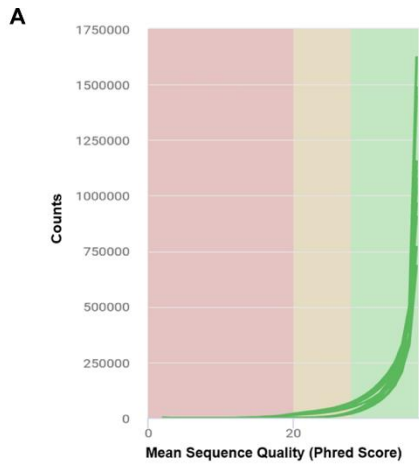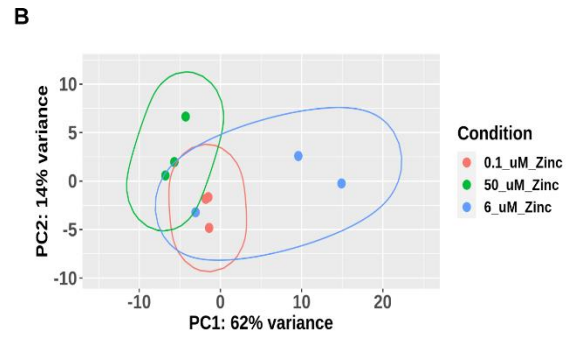

26

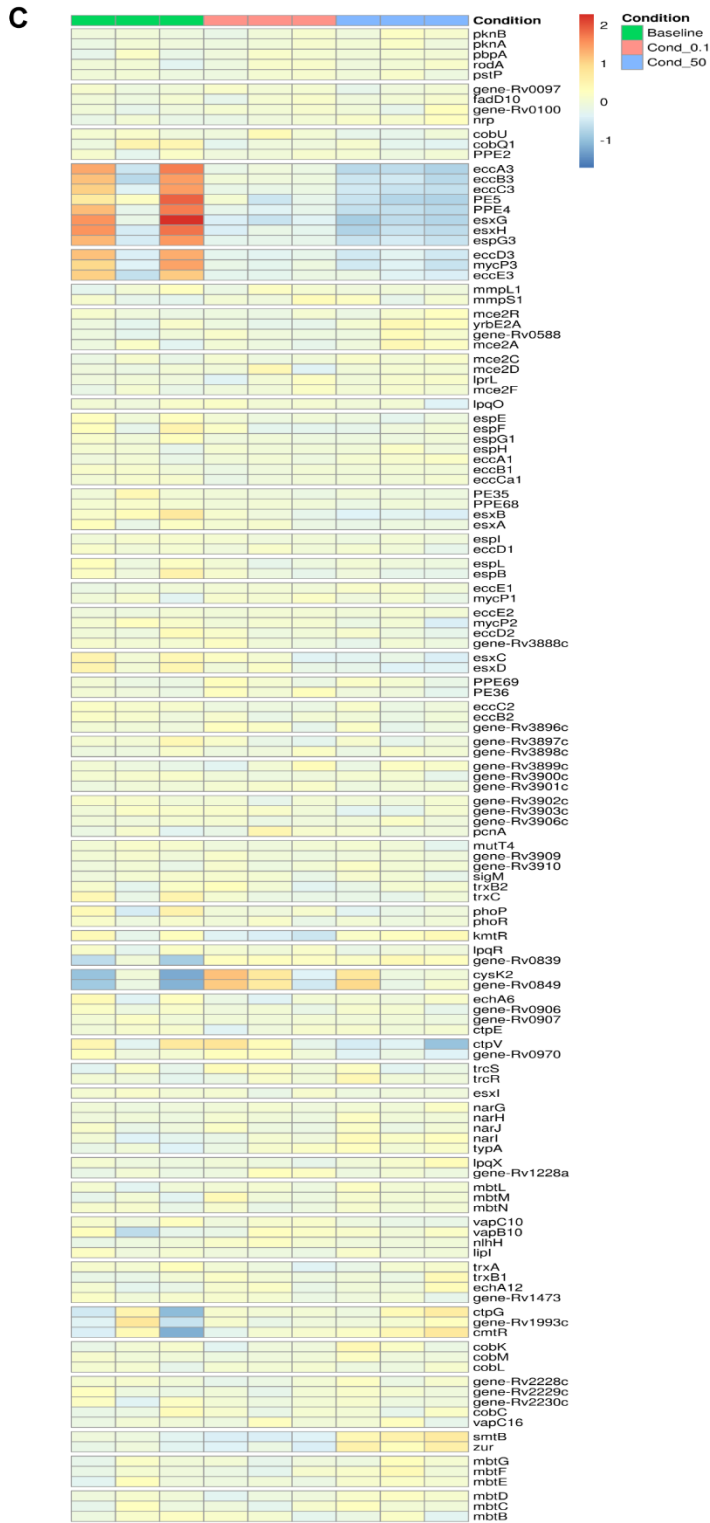

27  
28  
29  
30  
31  
32  
33

**Supplementary Figure 1:**

(A) Plot represents per sequence quality scores to depict if a subset of reads has poor quality. Y axis represents count and mean sequence quality, calculated as Phred score is plotted on x-axis.  
 (B) Principal Component Analysis (PCA) plot of gene expression data where samples with similar gene expression profiles cluster together. Sample groups are indicated by using different colors as

34 detailed in the legend provided, here each point represents a biological replicate. (C) Heat map for  
35 differential expression of few metal responsive and FAAL-PKS/NRPS *Mtb* operons in three different  
36 zinc conditions.  
37  
38  
39  
40  
41  
42  
43  
44  
45  
46  
47  
48  
49  
50  
51

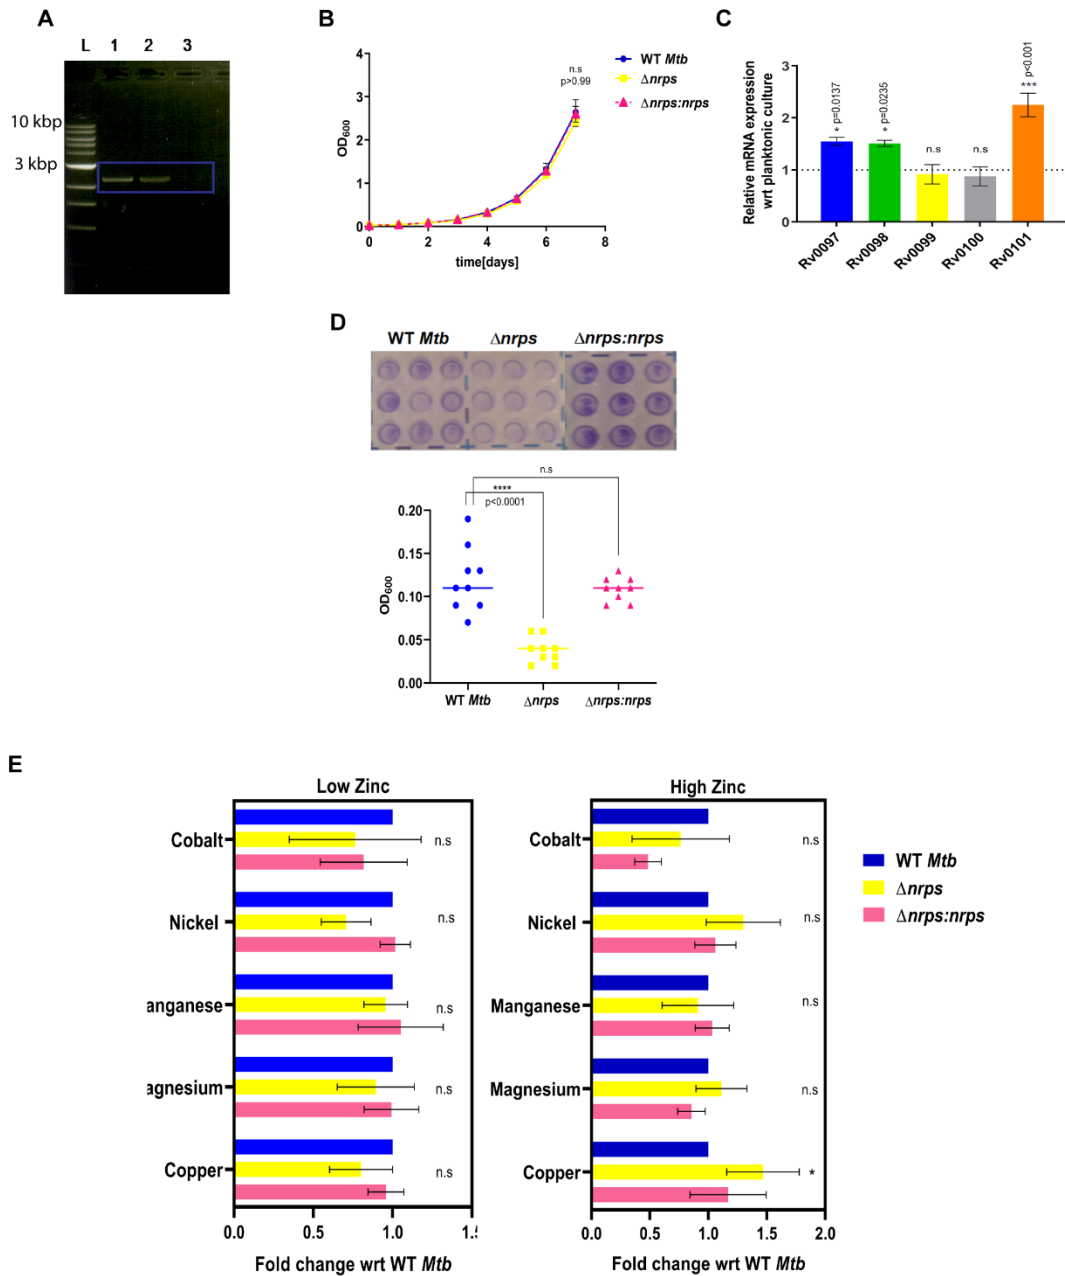

52  
 53 **Supplementary Figure 2:** (A) PCR confirmation of *nrps* deletion and complementation strain  
 54 generation using primers specific to region of Rv0101 gene. L: 1kb ladder, Lane 1- WT *Mtb* gDNA,  
 55 Lane 2-  $\Delta nrps:nrps$  gDNA and Lane 3-  $\Delta nrps$  gDNA. (B) Growth kinetics of WT *Mtb*,  $\Delta nrps$  and  
 56  $\Delta nrps:nrps$  strains in complete 7H9 media show no growth profile differences for either strain. (C)  
 57 Gene expression analysis of Rv0097-Rv0101 operon in WT *Mtb* planktonic and biofilm cultures (D)  
 58 Crystal violet staining for biomass estimation of biofilm cultures of WT *Mtb*,  $\Delta nrps$  and  $\Delta nrps:nrps$   
 59 strains with quantitation of same by spectrophotometric measurement of absorbance. (E) ICP-MS

60 analysis of WT,  $\Delta nrps$  and  $\Delta nrps:nrps$  *Mtb* strains show no significant difference in intracellular  
61 levels of copper, magnesium manganese, cobalt and nickel in cultures grown under low zinc-  
62 Sauton's medium condition. Similarly, no significant difference could be observed in intracellular  
63 levels of magnesium, manganese, cobalt and nickel in cultures grown under high zinc-Sauton's  
64 medium condition. Some differences though could be observed in total levels of copper as  
65 compared to WT *Mtb*. Each experiment was done with 3 biological replicates. Data represents  
66 mean  $\pm$  s.e.m with p values indicated at each data point.

67  
68  
69  
70  
71  
72  
73  
74  
75  
76  
77  
78  
79  
80  
81  
82  
83  
84  
85  
86  
87  
88  
89  
90  
91  
92  
93  
94  
95  
96  
97  
98  
99  
100  
101  
102  
103  
104  
105  
106  
107  
108

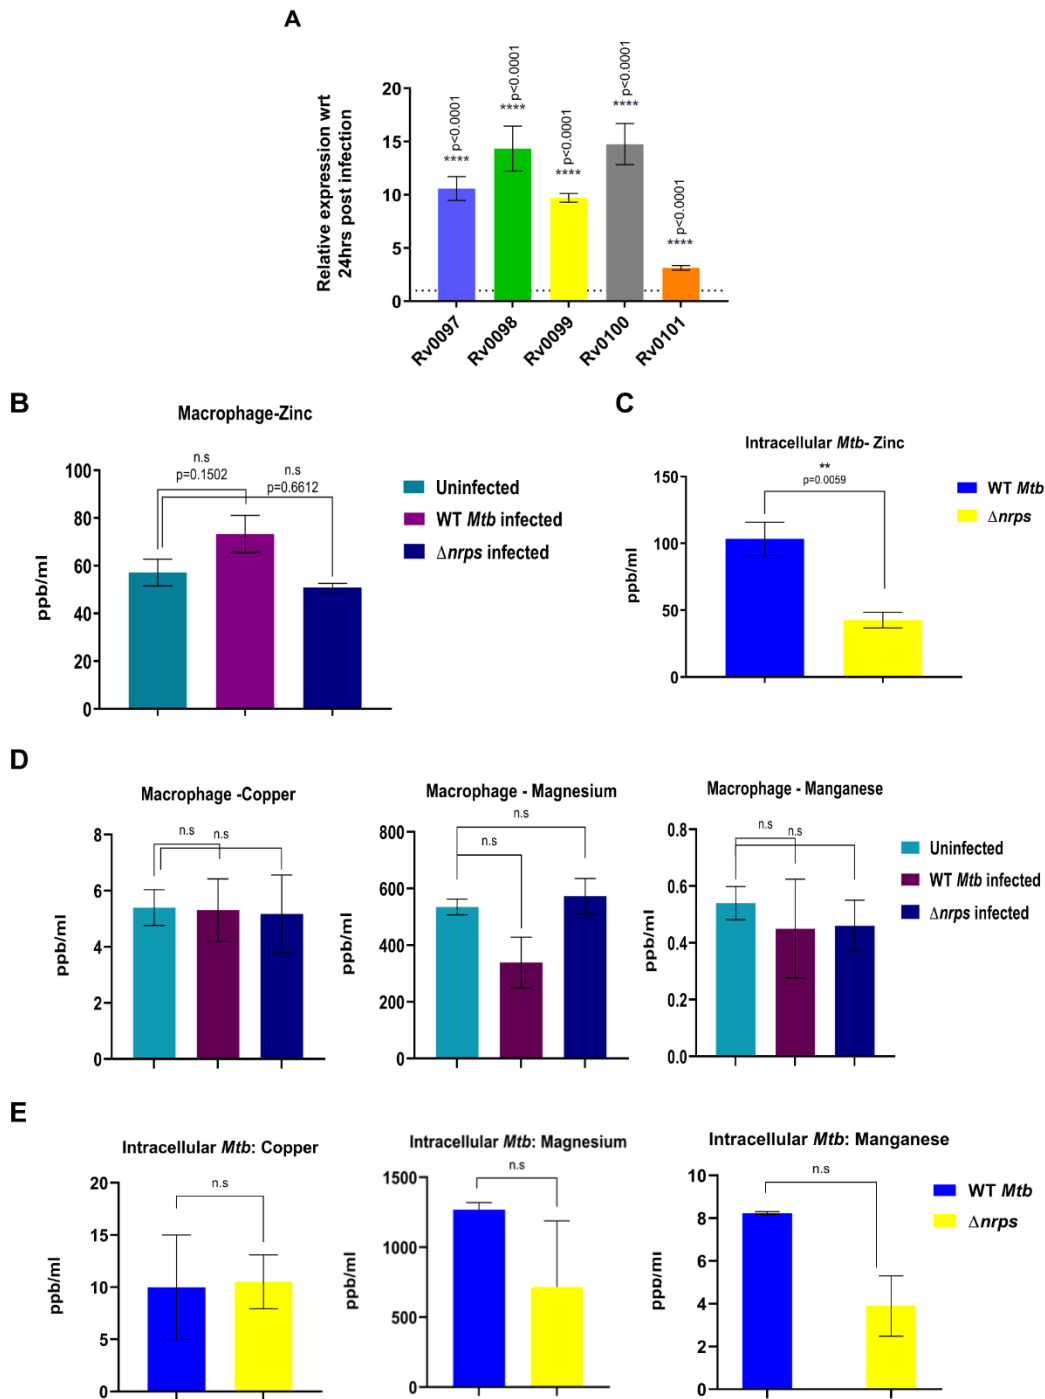

109  
 110 **Supplementary Figure 3:** (A) Relative gene expression of Rv0097-Rv0101 cluster in WT *Mtb*  
 111 isolated from infected RAW 264.7 murine macrophages at 2 hours with respect to 24 hours post  
 112 infection. (B) ICP-MS analysis showed no significant changes in total zinc pool of macrophages  
 113 upon WT or  $\Delta nrps$  *Mtb* infection as compared to uninfected macrophages. (C) ICP-MS analysis of  
 114 *Mtb* harvested from macrophages post 2 hours of infection show significantly decreased  
 115 intracellular levels of zinc in  $\Delta nrps$  *Mtb* strain as compared to WT *Mtb*. (D) ICP-MS analysis of  
 116 macrophage lysate post infection with WT *Mtb* and  $\Delta nrps$  show no differences in intracellular levels

117 of copper, magnesium and manganese post 2 hours infection as compared to WT *Mtb*. (E) ICP-  
118 MS analysis for measurement of levels of copper, magnesium and manganese in intracellular *Mtb*  
119 harvested post infection. No differences could be observed in the total levels of copper, magnesium  
120 and manganese. Each experiment was done with 3 biological replicates. Data represents mean  $\pm$   
121 s.e.m, with p value indicated at each data point.

122  
123  
124  
125  
126  
127  
128  
129  
130  
131  
132  
133  
134  
135  
136  
137  
138  
139  
140  
141  
142  
143  
144  
145  
146  
147  
148  
149  
150  
151  
152  
153  
154  
155  
156  
157  
158  
159  
160  
161  
162  
163  
164  
165  
166  
167  
168  
169  
170  
171  
172



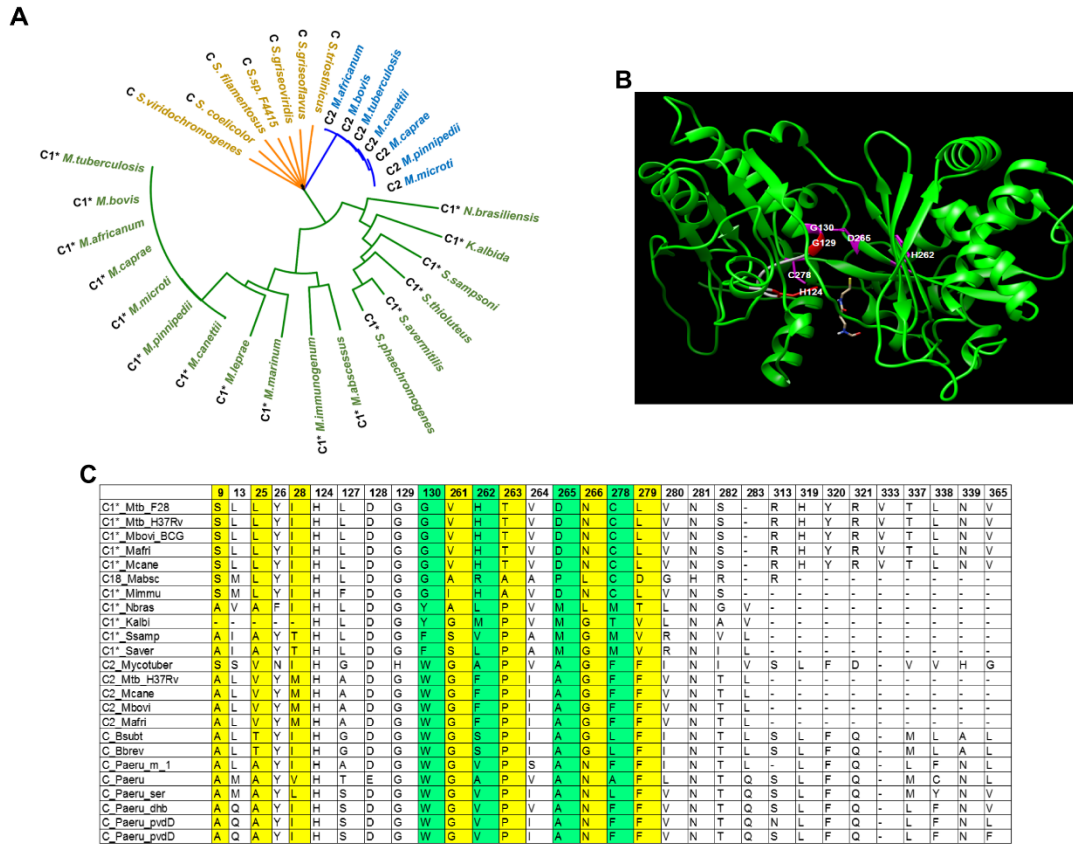

173  
174  
175  
176  
177  
178  
179  
180  
181  
182  
183  
184  
185  
186  
187  
188  
189  
190  
191  
192  
193  
194  
195  
196  
197  
198  
199

**Supplementary Figure 4: (A)** Dendrogram-based clustering analysis of condensation domains that are present in the NRPS protein of similar 5 gene biosynthetic loci from other *Actinomycetes* along with classical condensation domain of *NRPS* genes. The starter condensation domain from these 5-genes NRPS are distinctively different (C1\*) from other classical condensation domains (C). The second condensation domain (C2) present in bimodular 5-genes NRPS protein clusters with classical C domains. **(B)** Modelling based structure prediction of unique starter condensation domain (C1\*) with residues possibly contributing to isonitrile stability colour coded. Magenta–Residues within 10 Å of –SH of 4'-phosphopantethiene, Red – H124, G129 (catalytic residues), White – HHxxDG (conserved motif). Distance between them is 7.6 Å. **(C)** Sequence analysis of C domains in *kupya* operon and classical NRPS of *Actinomycetes* reveal 31 residues having at least one atom within 10 Å radius of last atom of 4'-phosphopantethiene sidechains to be conserved uniquely in C1\*.

200  
201  
202  
203  
204  
205  
206  
207  
208  
209  
210  
211  
212  
213  
214  
215  
216  
217  
218  
219  
220  
221  
222  
223  
224  
225  
226  
227  
228  
229  
230  
231  
232  
233  
234  
235  
236  
237  
238  
239  
240  
241  
242  
243  
244  
245

**A**

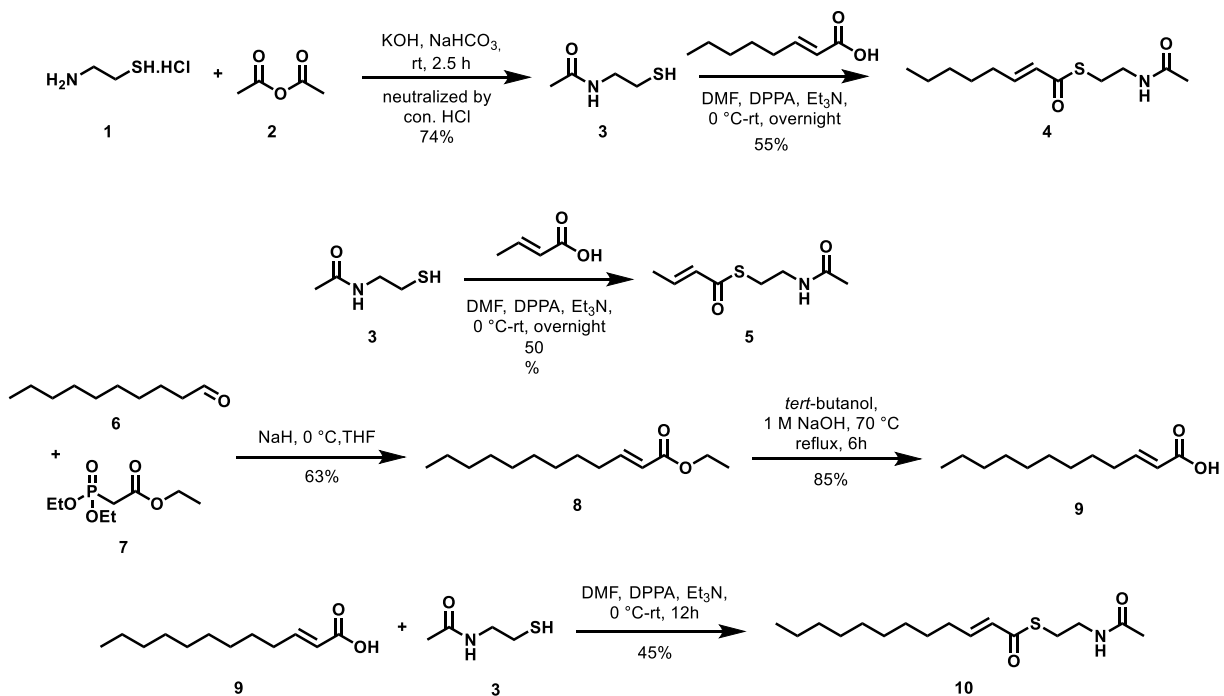

246  
247

**B**

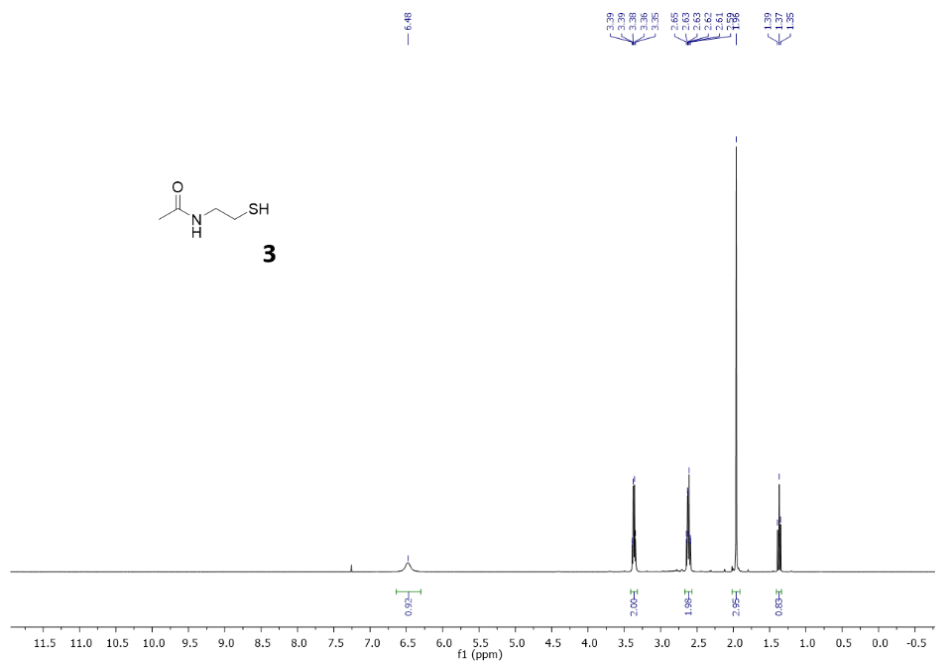

<sup>1</sup>H NMR analysis of **03** in CDCl<sub>3</sub> at 400MHz

248  
249  
250  
251

**C**

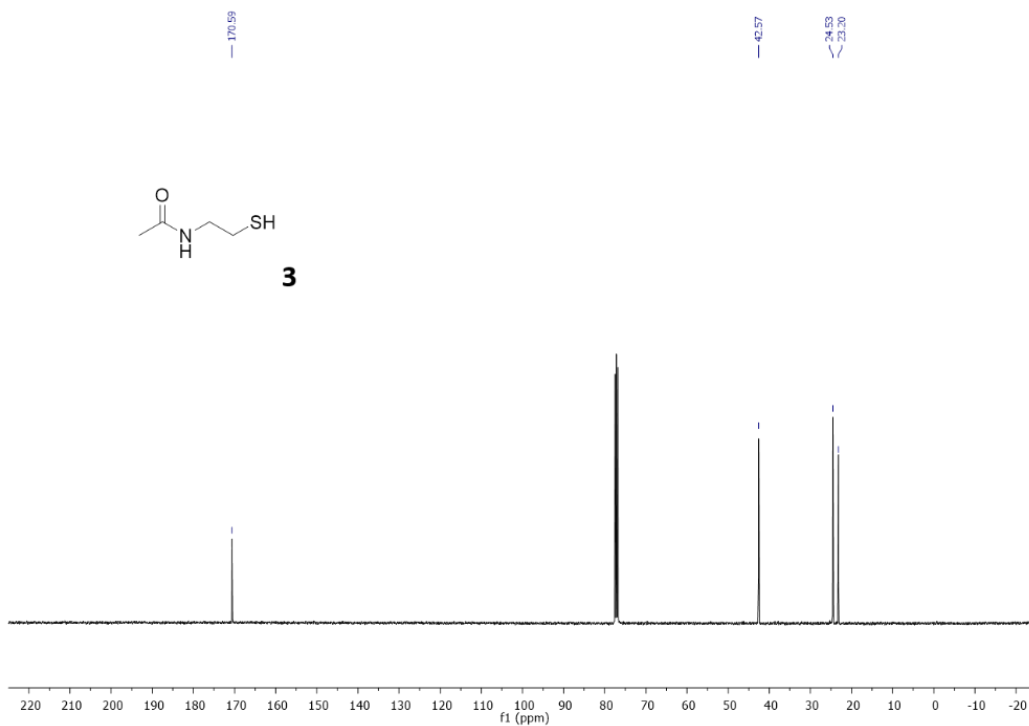

<sup>13</sup>C NMR analysis of **03** in CDCl<sub>3</sub> at 100MHz

252  
253  
254  
255  
256

257  
258 **D**

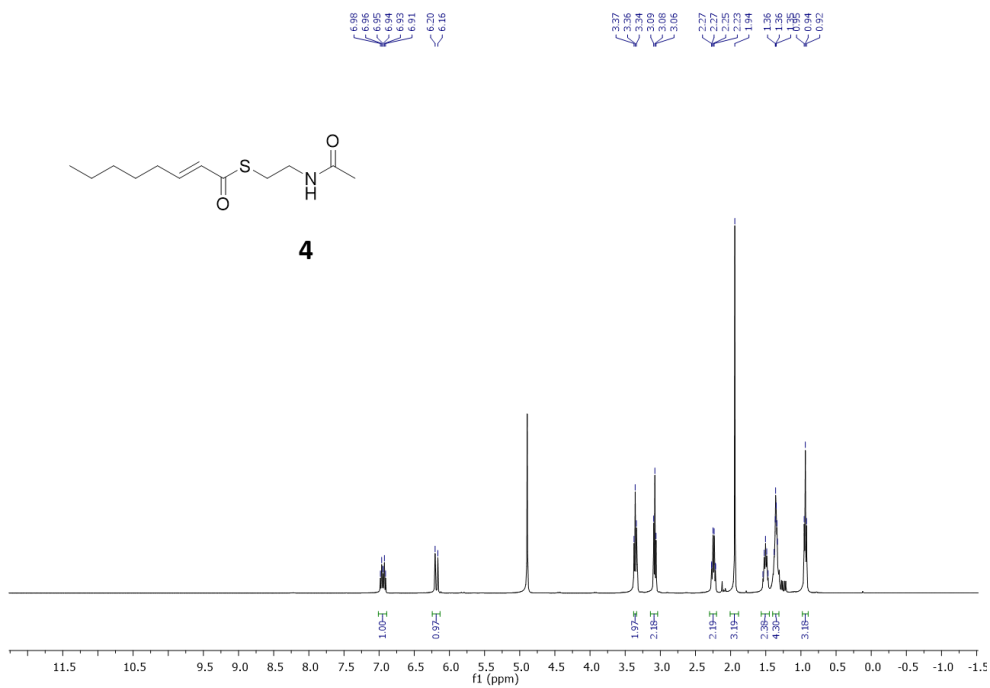

259  
260  
261  
262  
263 **E**

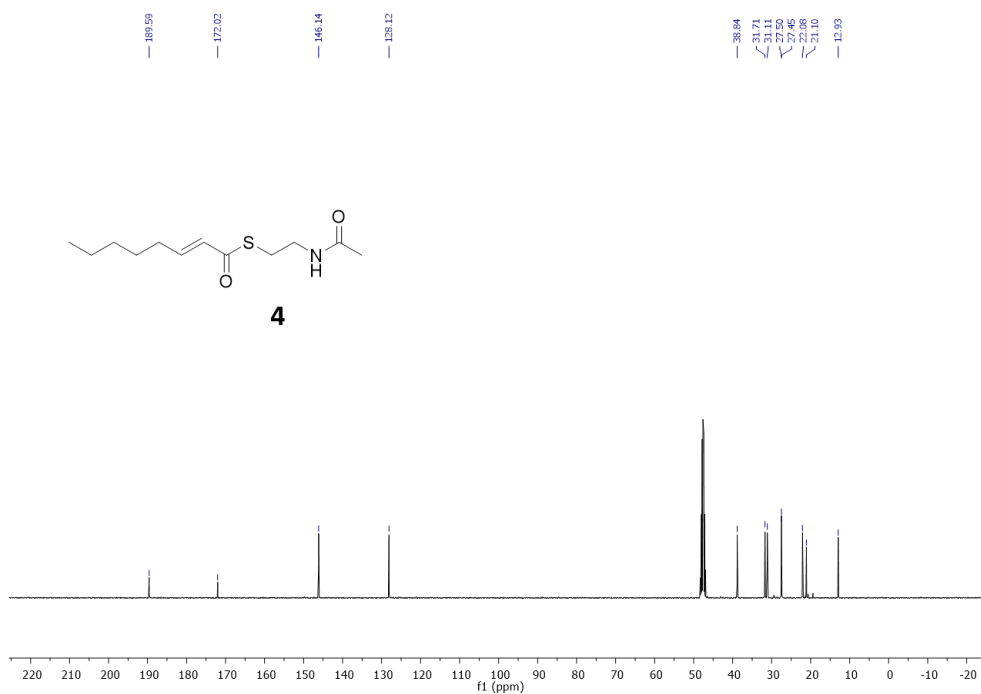

264  
265  
266  
267

268  
269

**F**

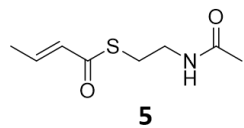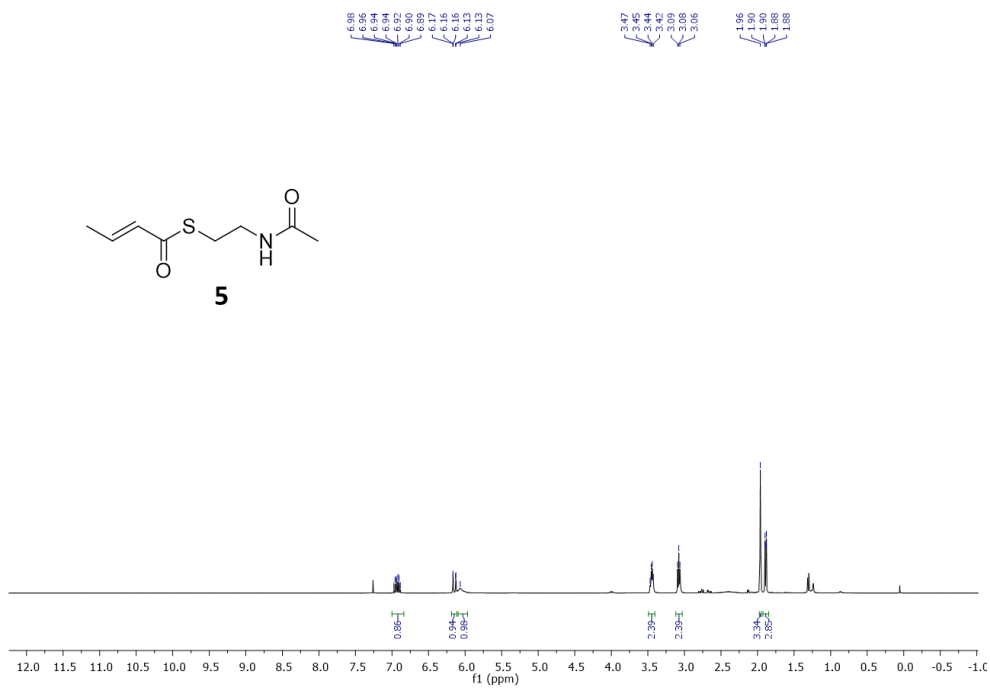

<sup>1</sup>H NMR analysis of **05** in CDCl<sub>3</sub> at 400MHz

270  
271  
272  
273  
274

**G**

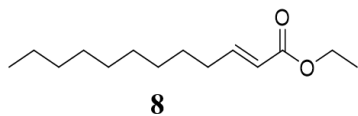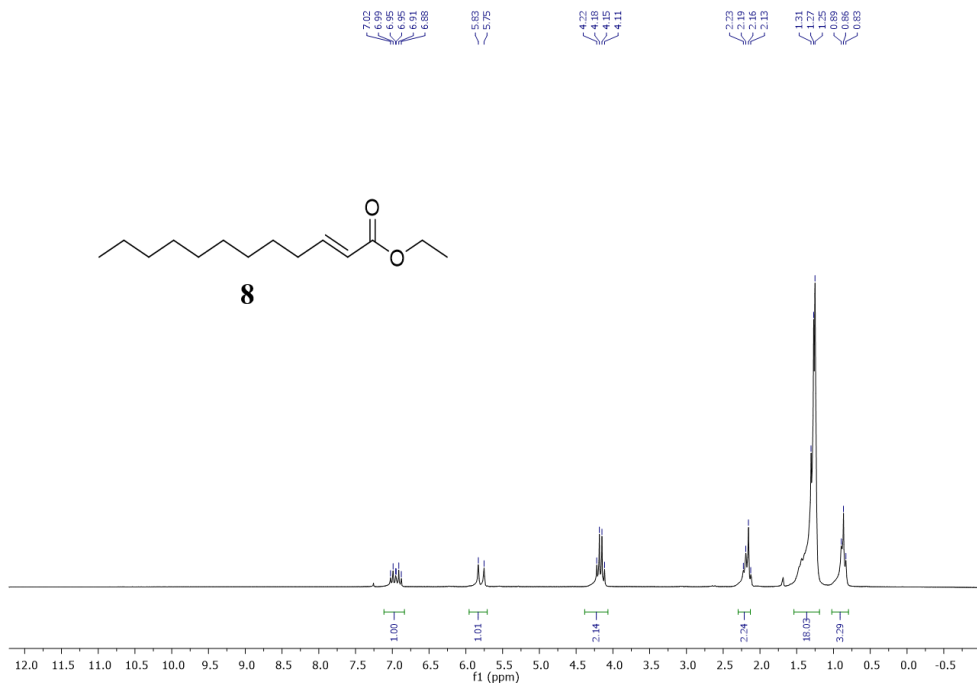

<sup>1</sup>H NMR analysis of **08** in CDCl<sub>3</sub> at 200MHz

275  
276  
277  
278

279  
280 H

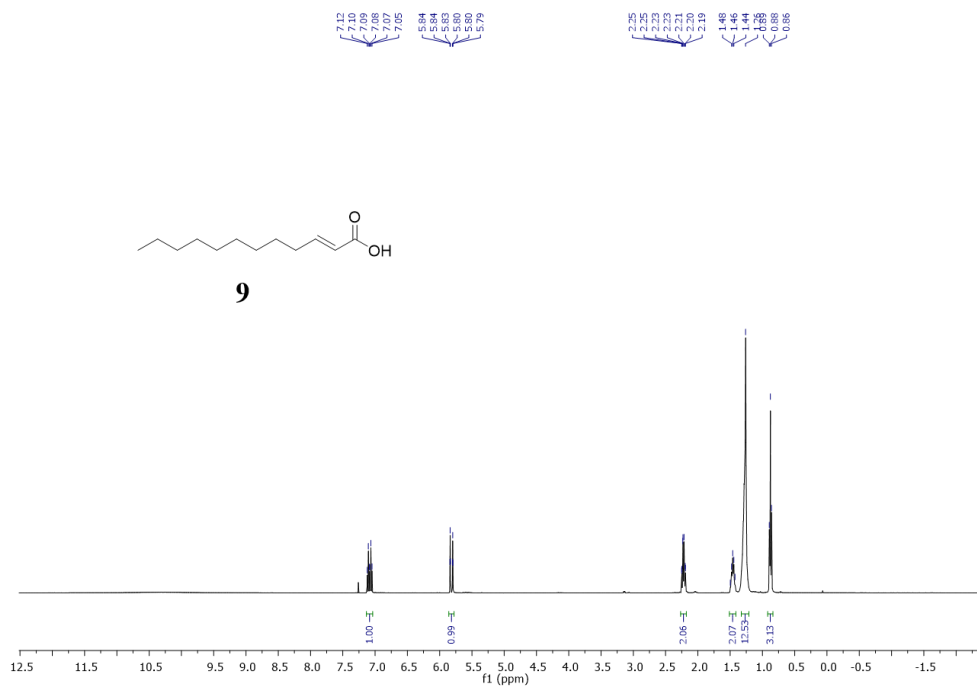

<sup>1</sup>H NMR analysis of **09** in CDCl<sub>3</sub> at 400MHz

281  
282  
283  
284 I

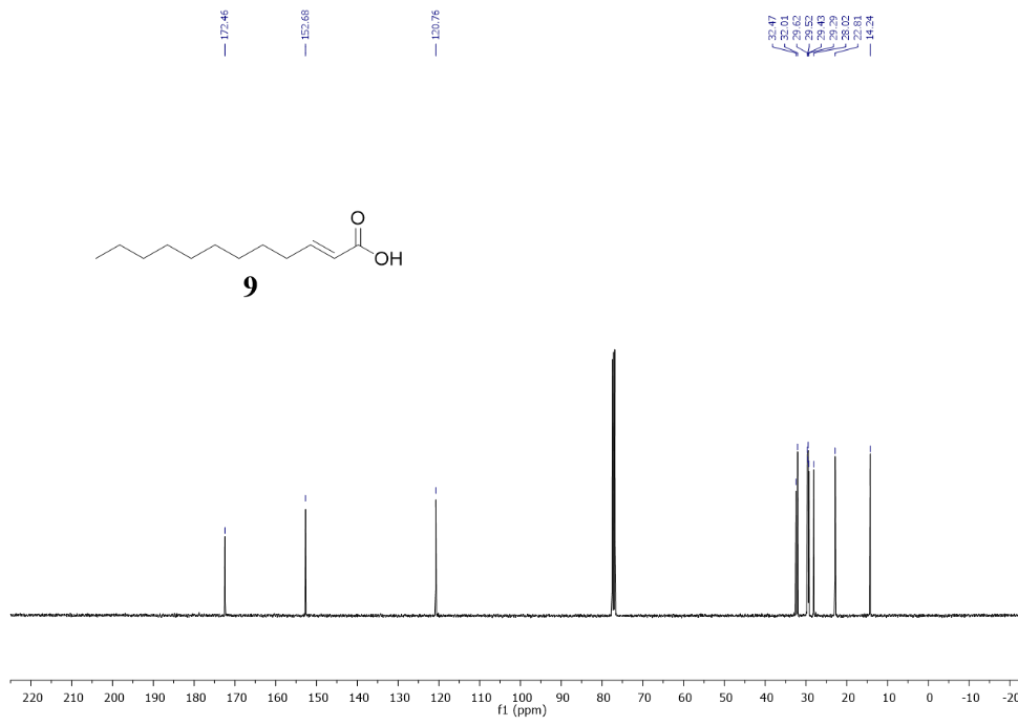

<sup>13</sup>C NMR analysis of **09** in CDCl<sub>3</sub> at 100MHz

285  
286  
287  
288

289  
290 J

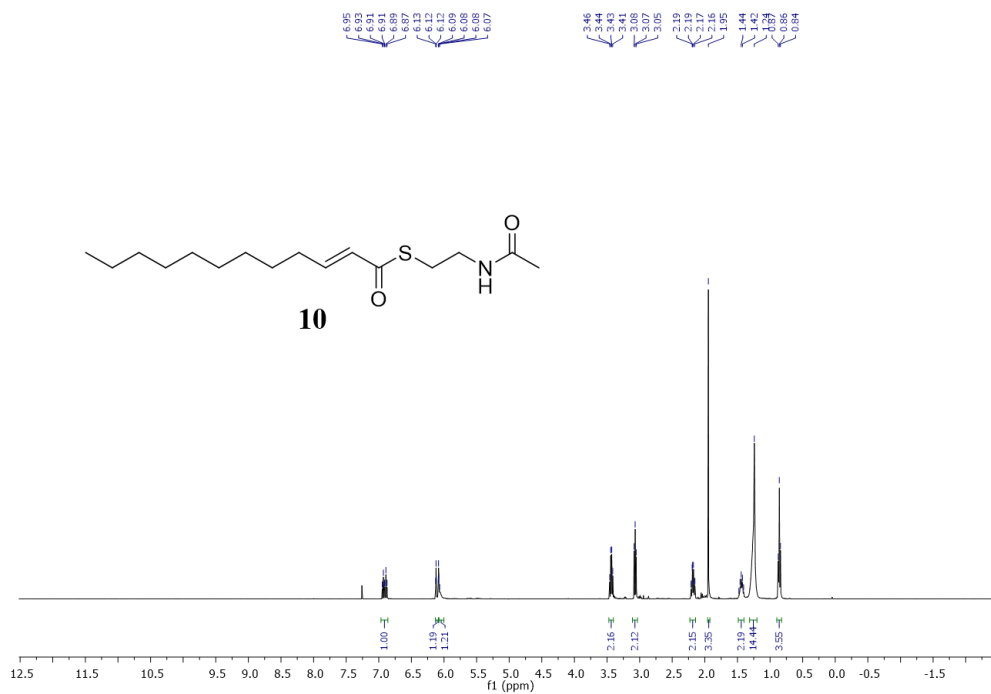

<sup>1</sup>H NMR analysis of **10** in CDCl<sub>3</sub> at 400MHz

291  
292  
293  
294 K

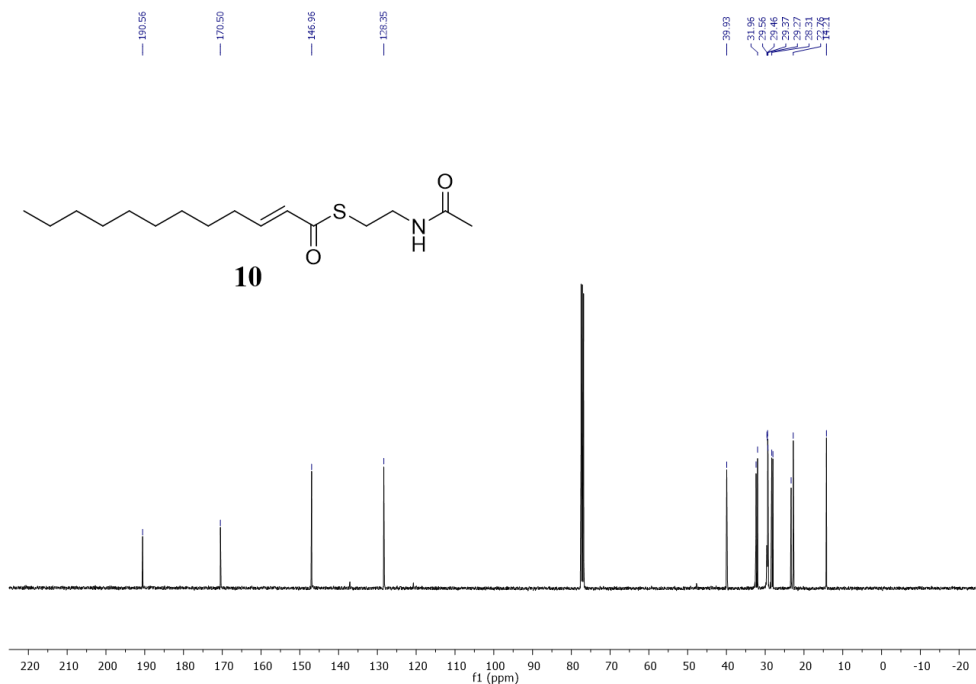

<sup>13</sup>C NMR analysis of **10** in CDCl<sub>3</sub> at 100MHz

295  
296  
297  
298  
299

300 **Supplementary Figure 5:** (A) Reaction Scheme for synthesis of 2-dodecanoyl-S-N-  
301 acetylcysteamine **10** with intermediate metabolites labelled **1** to **10**. <sup>1</sup>H (B), (D), (F), (G), (H), (J)  
302 and <sup>13</sup>C NMR analysis (C), (E), (I), (K) of intermediates **3**, **4**, **5**, **8**, **9**, **10** and **3**, **8**, **9**, **10** respectively.  
303  
304  
305  
306  
307  
308  
309  
310  
311  
312  
313  
314  
315  
316  
317  
318  
319  
320  
321  
322  
323  
324  
325  
326  
327  
328  
329  
330  
331  
332  
333  
334  
335  
336  
337  
338  
339  
340  
341  
342



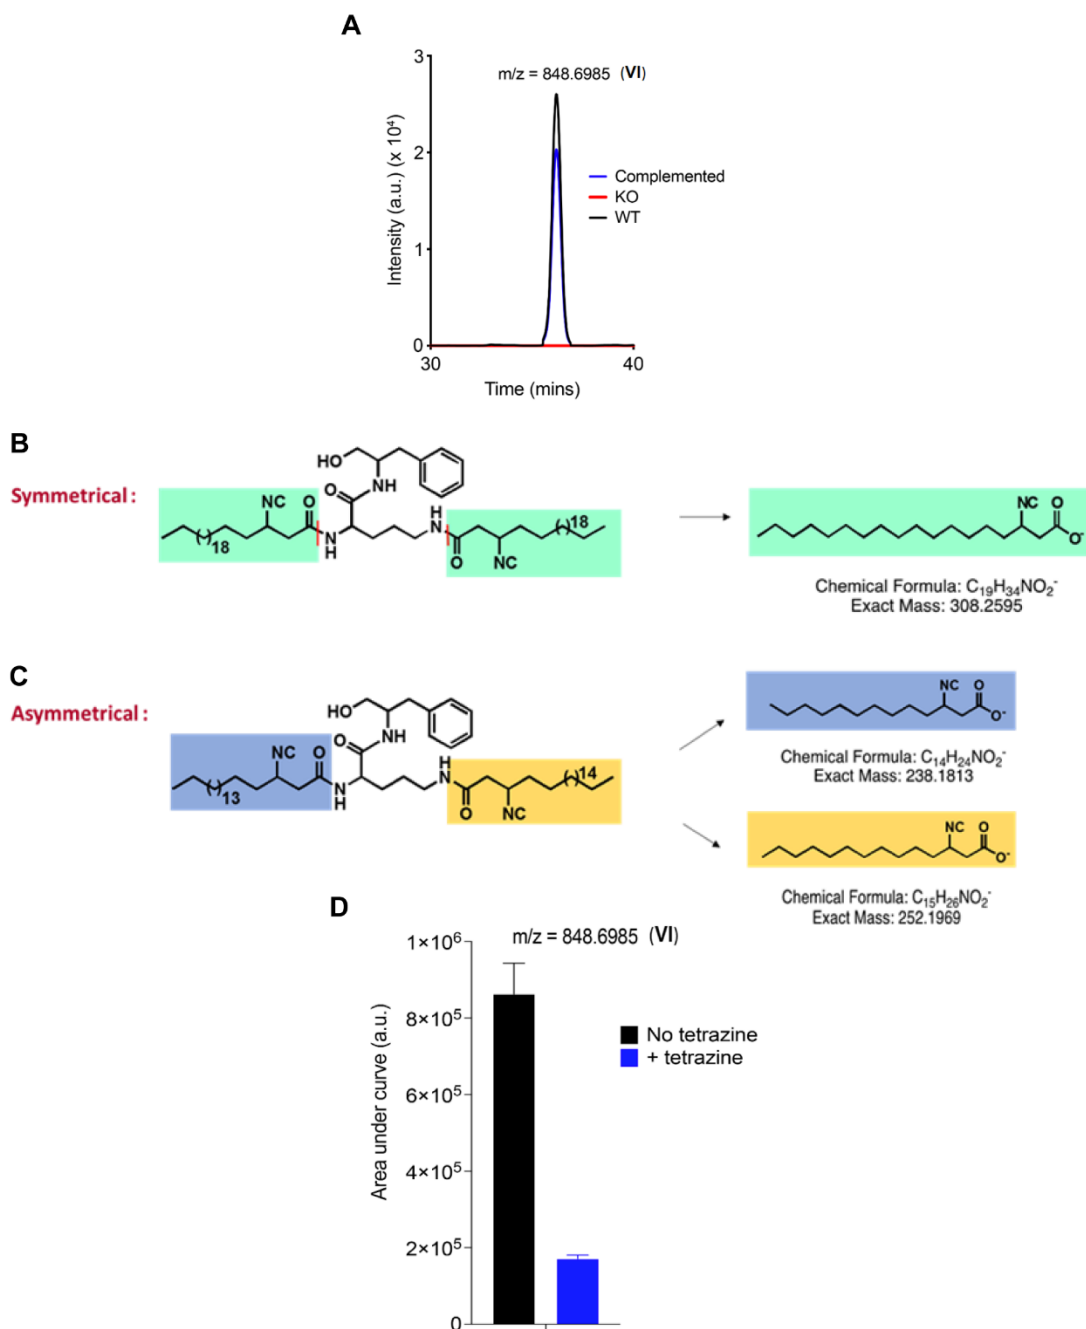

343  
344  
345  
346  
347  
348  
349  
350  
351  
352  
353

**Supplementary Figure 6:** (A) Comparative EIC of kupyaphore VI of  $m/z$  for  $(M+H)^+ = 848.6985$  from biofilm extracts of WT,  $\Delta nrps$ ,  $\Delta nrps:nrps$  *Mtb* strains. (B), (C) Negative ion mode HRMS analysis of parent lipopeptide revealed 2 series of acyl chain substitutions – symmetrical and asymmetrical. Symmetrical kupyaphores possibly have identical acyl chains substituted at both the amine groups of ornithine. Asymmetrical kupyaphores though differ in their acyl substitutions either in terms of chain length or branched substitutions resulting in mass differences. (D) Relative abundance of kupyaphore VI with or without tetrazine addition to WT *Mtb* culture extract. Each experiment was performed in triplicates with mass error tolerance of 10 ppm.

354

A

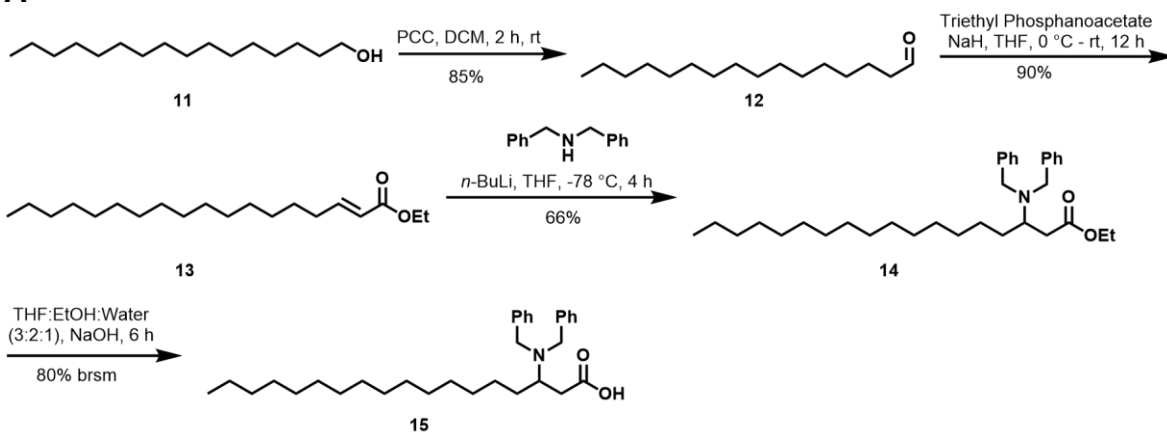

355

356

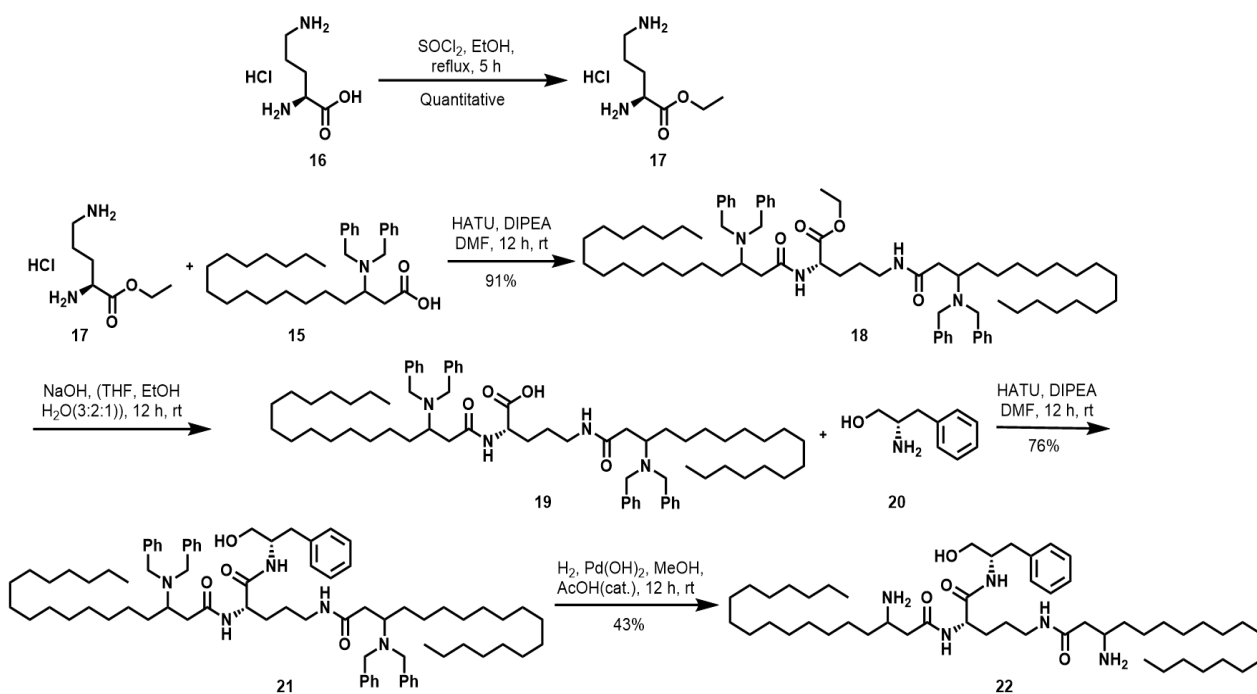

357

358

359

360

361

362

363

364

365

366

367

368

369

370

371

372 **B**

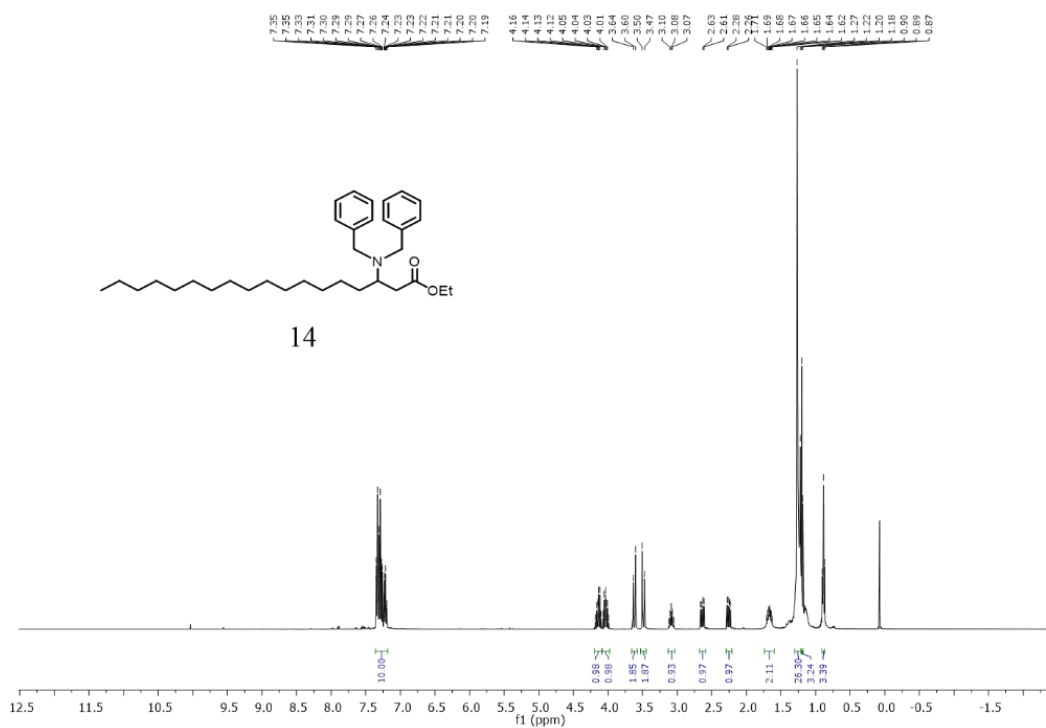

373  
374  
375  
376  
377

**C**

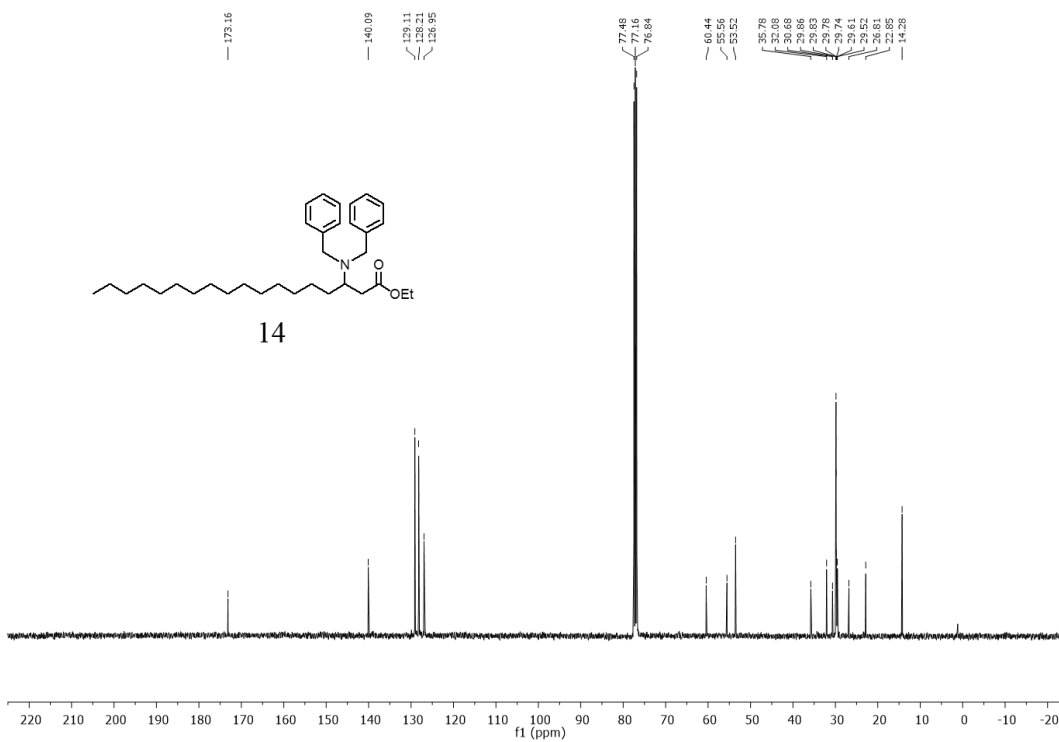

378  
379  
380

381 **D**

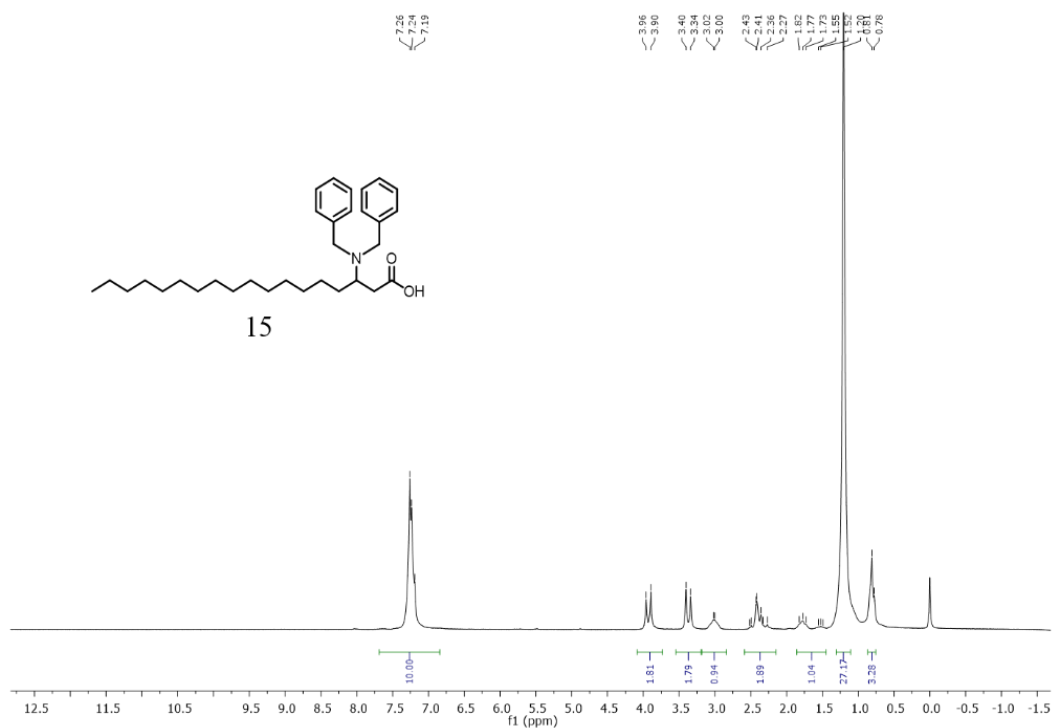

<sup>1</sup>H NMR analysis of **15** in CDCl<sub>3</sub> at 200MHz

382  
383  
384  
385  
386

**E**

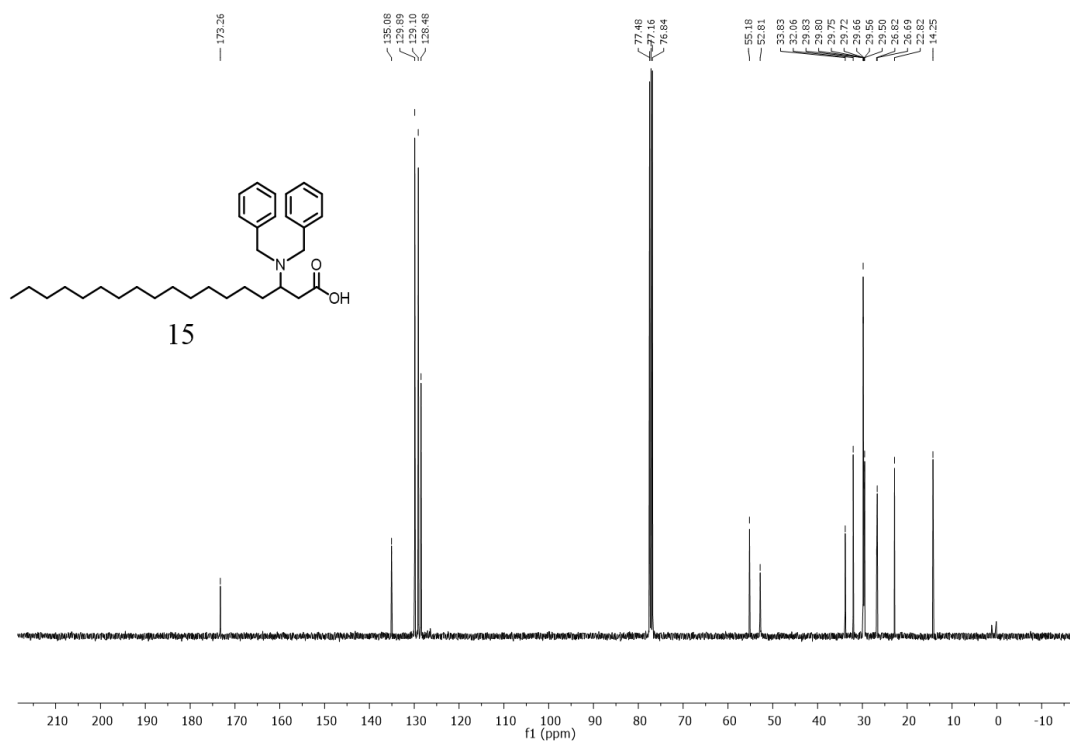

<sup>13</sup>C NMR analysis of **15** in CDCl<sub>3</sub> at 100MHz

387  
388  
389

390 **F**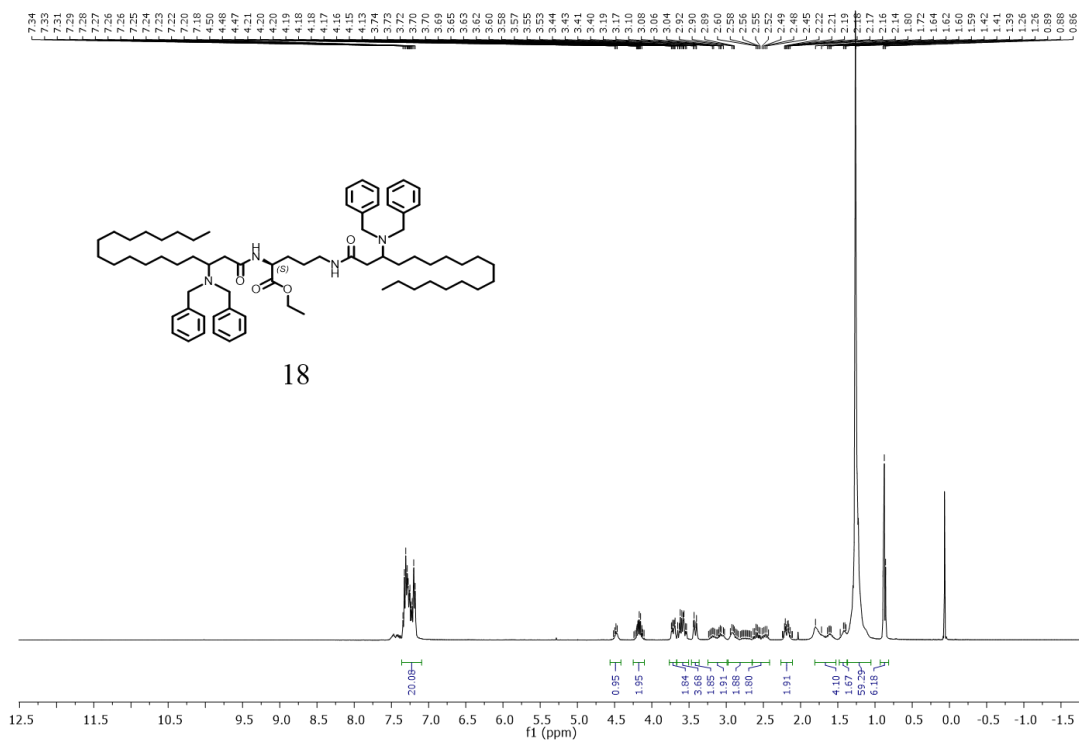391  
392  
393  
394**G**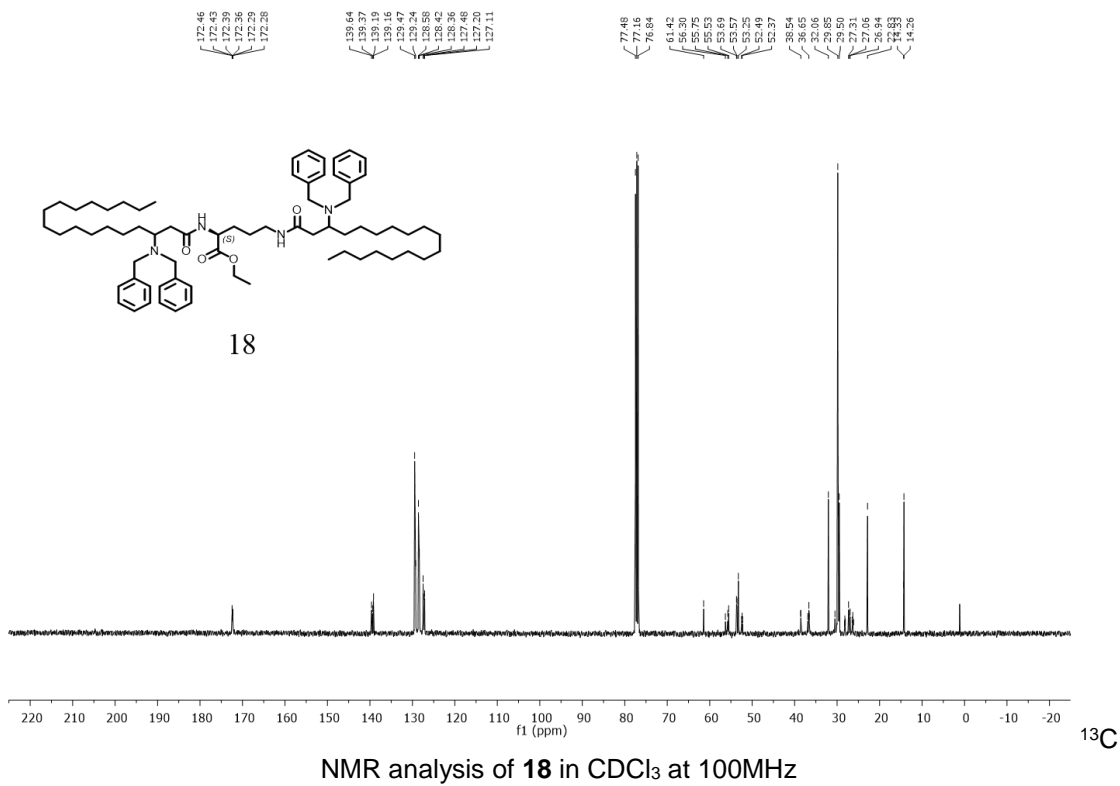395  
396  
397

398 H

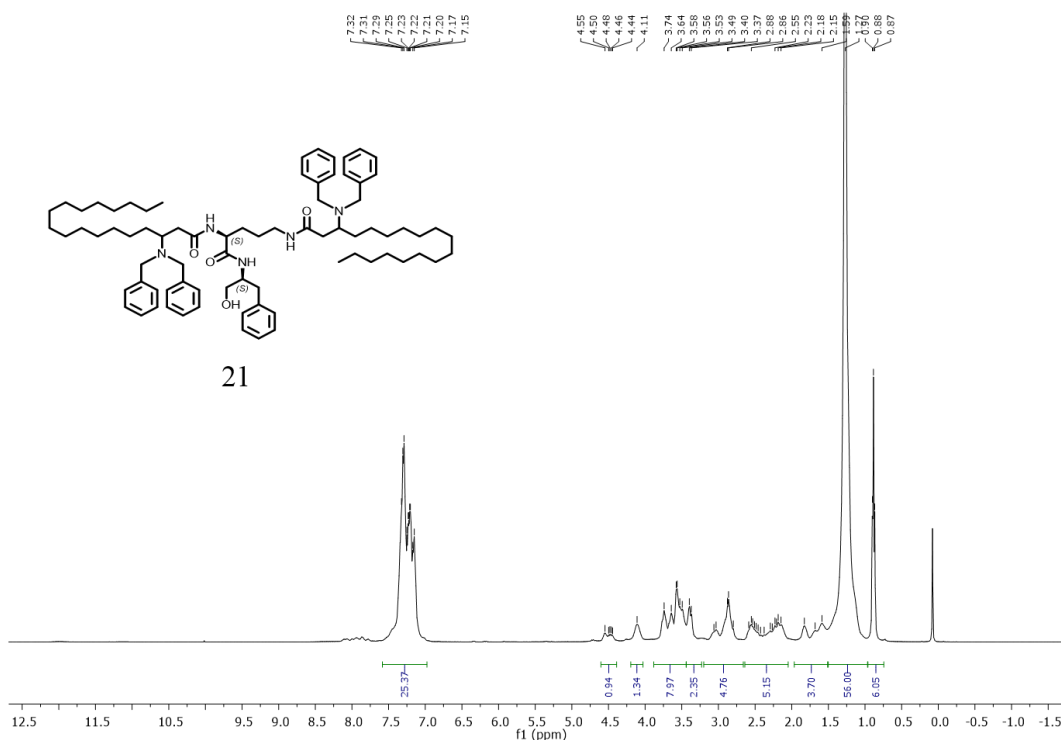

399  
400  
401  
402

I

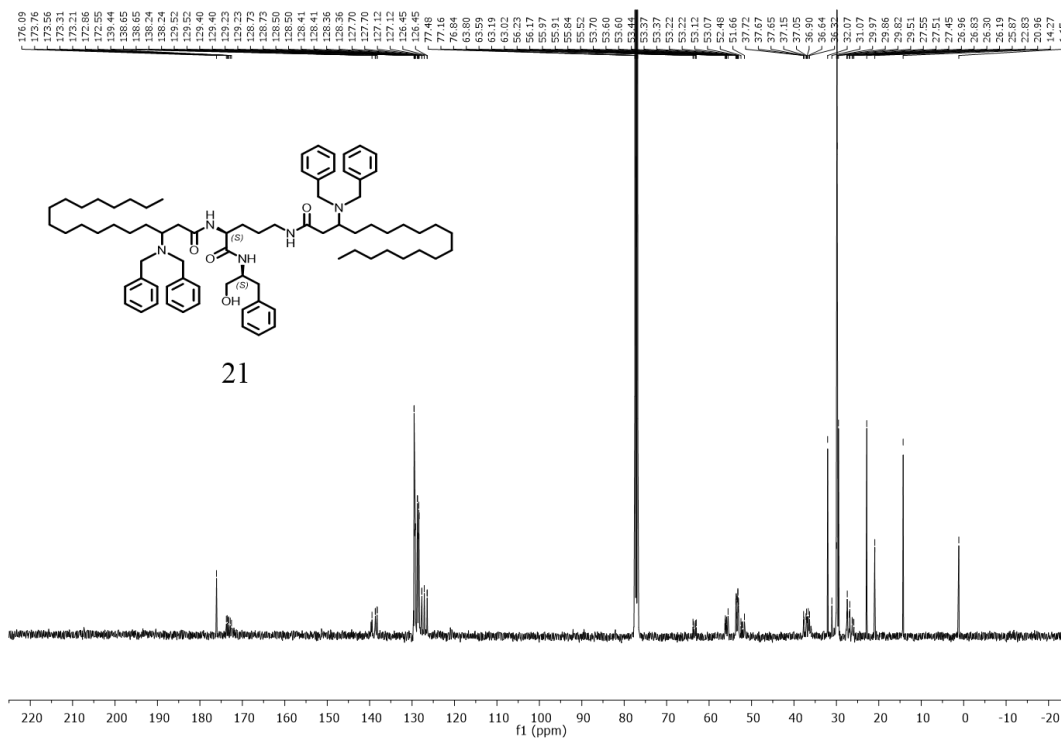

403  
404  
405

406 J

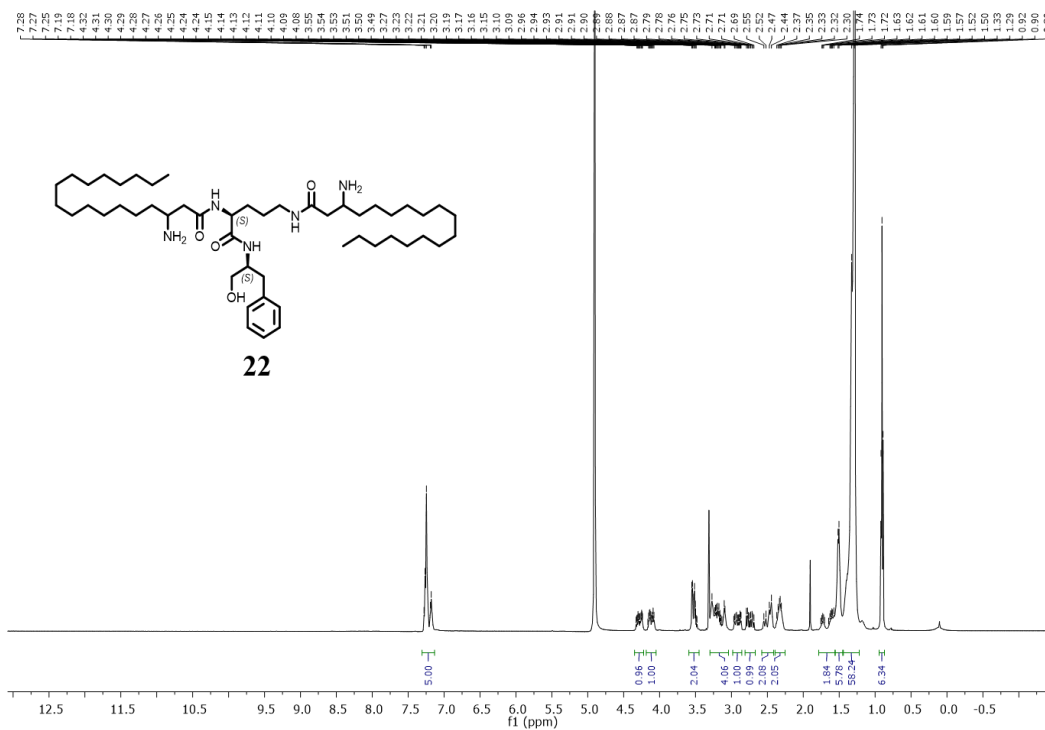

407  
408  
409  
410

K

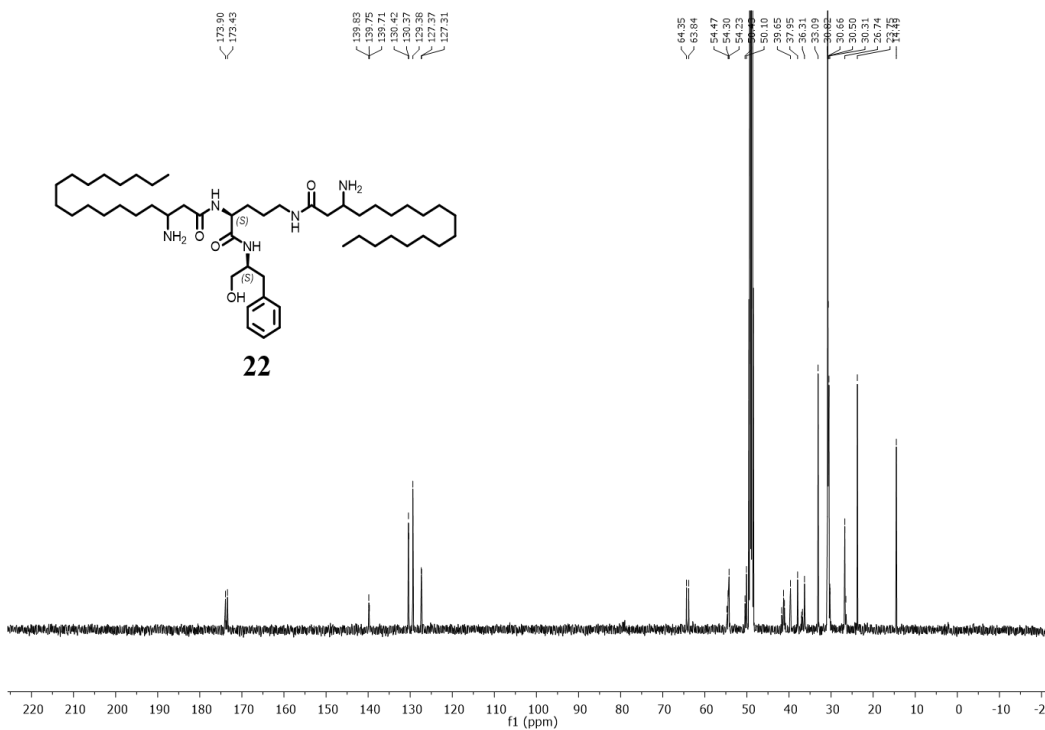

411  
412  
413  
414

415 L

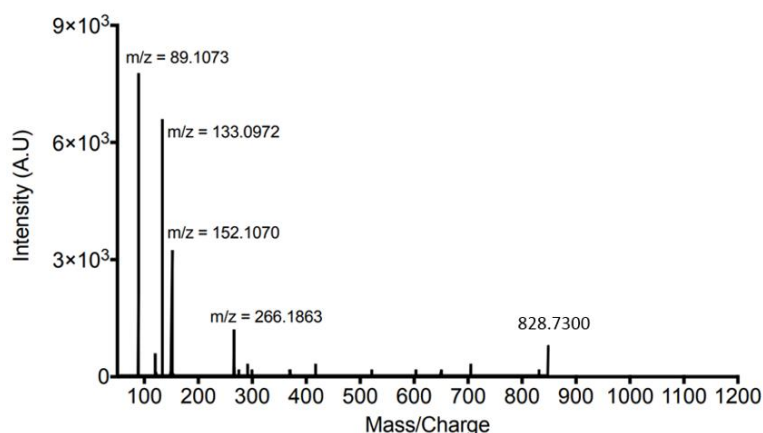

416

417

418 **Supplementary Figure 7: (A)** Reaction scheme and confirmation of synthesis of  $\beta$ -amine  
419 substituted isonitrile lipopeptide **22** with intermediates labelled from **11** to **22**. <sup>1</sup>H (**B**), (**D**), (**F**), (**H**),  
420 (**J**) and <sup>13</sup>C NMR analysis (**C**), (**E**), (**G**), (**I**), (**K**) of key intermediates **14**, **15**, **18**, **21**, **22**. (**L**) Positive  
421 ion mode MS/MS analysis of chemically synthesized standard **22** show identical spectra as *Mtb*  
422 endogenous kupyaphore lipopeptides.

423

424

425

426

427

428

429

430

431

432

433

434

435

436

437

438

439

440

441

442

443

444

445

446

447

448

449

450

451

452

453

454

455



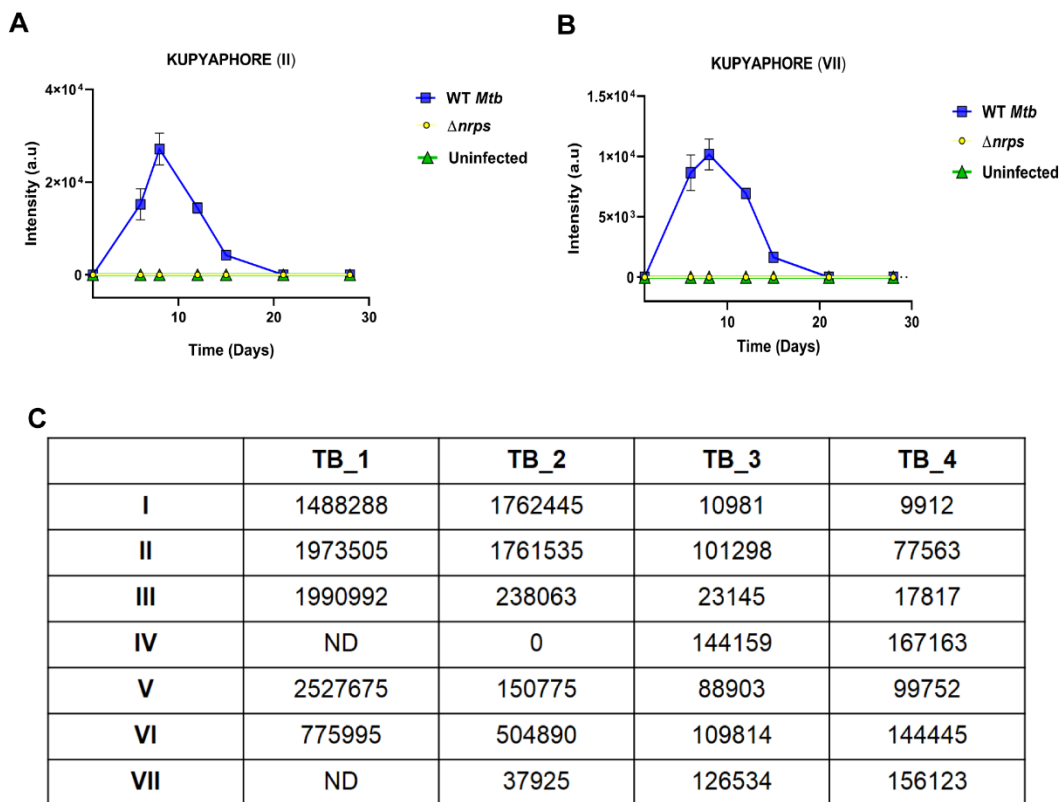

456  
 457  
 458  
 459  
 460  
 461  
 462  
 463  
 464  
 465  
 466  
 467  
 468  
 469  
 470  
 471  
 472  
 473  
 474  
 475  
 476  
 477  
 478  
 479  
 480  
 481

**Supplementary Figure 8:** (A), (B) Plots show MRM-based semi-quantitative LC-MS measurements of kupyaphore species – II and VII of  $m/z$  for  $[M+H]^+ = 722.55$  and  $848.69$  respectively, from lungs of uninfected, WT and  $\Delta nrps$  *Mtb* infected mice. Data represents mean  $\pm$  s.e.m ( $n=3$  biological replicates per strain at each time point). (C) Relative abundance of kupyaphores species I-VII isolated from early passage clinical strains of *Mtb* isolated from TB patients.

482  
483  
484  
485  
486  
487  
488  
489  
490  
491  
492  
493  
494  
495  
496  
497  
498  
499  
500  
501  
502  
503

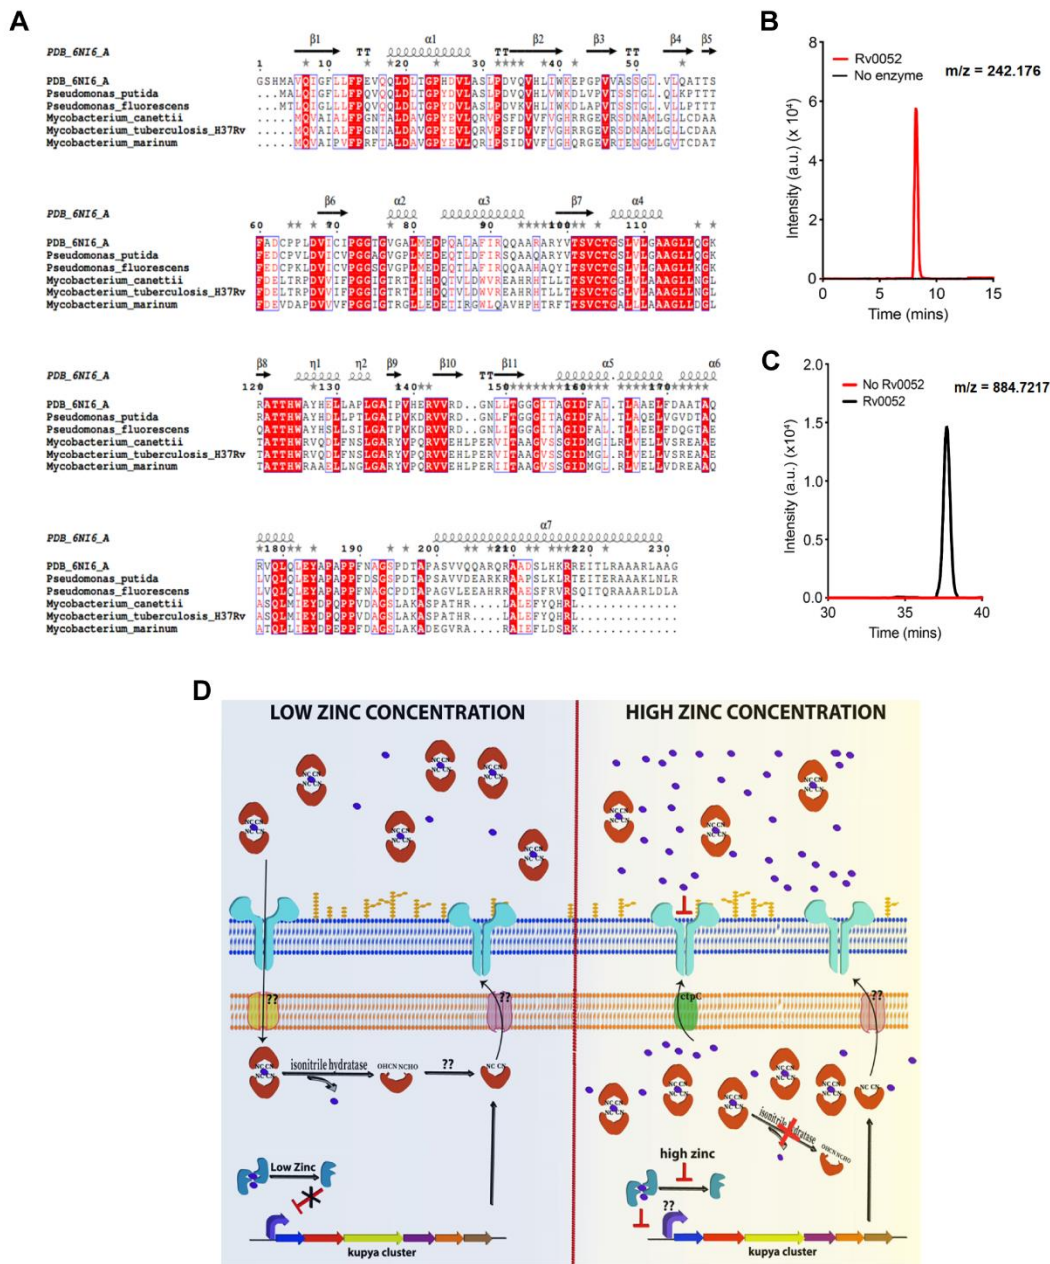

504  
 505  
 506  
 507  
 508  
 509  
 510  
 511  
 512  
 513  
 514  
 515  
 516

**Supplementary Figure 9:** (A) Multiple sequence alignment of isonitrile hydratase across members of pathogenic mycobacteria family with characterized isonitrile hydratase from *Pseudomonas*. (B) EIC for formamide product of  $m/z$  for  $(M-H)^- = 242.176$  in *in vitro* assay of C12-isonitrile substrate with or without purified Rv0052 protein. (C) EIC of diformamide kupyphore analogue of  $m/z$  for  $(M+H)^+ = 884.7217$  in *in vitro* reaction of kupyphores with or without purified Rv0052 protein. (D) Proposed model for kupyphore mediated nutritional passivation of zinc in *Mtb*. Secretion of kupyphores under limiting zinc conditions would allow *Mtb* to scavenge zinc from environment with concomitant intracellular release through isonitrile hydratase. Conversely, under toxic zinc conditions, kupyphores would chelate intracellular accumulated zinc levels thus contributing to metal detoxification by reducing the concentration of free zinc in the cytosol. Detailed mechanisms for kupyphore regulation and export under these two strikingly opposite conditions would be interesting to explore further.

517 **Supplementary Table 1: List of clones and primers**

518  
519

Clones generated in study –

| ID    | Clone details |
|-------|---------------|
| pAM1  | pet28c+Rv0097 |
| pAM2  | pet28c+Rv0098 |
| pRSB1 | pet28c+Rv0052 |

520  
521  
522

Primers used for cloning-

| Primer ID | Sequence                       |
|-----------|--------------------------------|
| Rv0097 FP | GGAGTACTATGACGCTTAAGGTCAAAGGCG |
| Rv0097 RP | GGAAGCTTTCATGCCGCGTATCCCGGCGT  |
| Rv0098 FP | GGAGTACTATGAGCCACACCGACTTGACG  |
| Rv0098 RP | GGAAGCTTTTACGGAATGTTGAGGGCCGC  |
| Rv0052 FP | TTCATATGCAGGTCGCGATCGCA        |
| Rv0052 RP | TTGAATTCGGCAAACGATGCTGATAGAA   |
| EUF20     | CTGCAGAGATCGAAGCAGGTGCTGTT     |
| EUR20     | AAGCTTTAACGCGGGATTGTTATCCT     |
| EUF21     | AAGCTTCAACTGCTCGGACTGCTGTAG    |
| EUR21     | CGCGGCCGCACACCGACGTCAGGATTACC  |

523  
524  
525

Primers used for gene expression analysis-

| Primer ID | Sequence             |
|-----------|----------------------|
| Rv0097 FP | CCAAAGACCGGCCAAGAGAT |
| Rv0097 RP | ATGTCGCCAACCTGGTAGTG |
| Rv0098 FP | AACGCGGTGCAACTGATTCT |
| Rv0098 RP | TGGTGTGGCAGTAGTCGTC  |
| Rv0099 FP | ATCTGTGGTGGCGTGAACAT |

|           |                      |
|-----------|----------------------|
| Rv0099 RP | TCAGGAATCTCGTAGCACGC |
| Rv0100 FP | TTGATGGCGACGAAACGGAT |
| Rv0100 RP | GTTCGGATTGTCGGTTCACG |
| Rv0101 FP | TCGGAGTGTGGTTCAAGAGC |
| Rv0101 RP | AAACGACGACACTCCCAGAC |

526  
527  
528  
529  
530  
531  
532  
533  
534  
535  
536  
537  
538  
539  
540  
541  
542  
543  
544  
545  
546  
547  
548  
549  
550  
551  
552  
553  
554  
555  
556  
557  
558  
559  
560  
561  
562  
563  
564

565 **Supplementary Information Methods:**

566

567 **Bacterial culture**

568 For metal studies, *Mtb* strains were grown in chelated Sauton's media. All glassware used for  
569 chelated media preparation were washed with teepol soap solution and dried in oven at 80°C for  
570 3-4 hours. The glass bottles were then treated with 0.01% EDTA overnight and rinsed with 0.1N  
571 HCL the next day. This was followed by rigorous washing with double distilled water 6-8 times and  
572 drying in oven at 80°C for another hour. Sauton's media was then prepared in double distilled water  
573 and autoclaved. Upon cooling, media was treated for 12 hours with 10 g/L of chelex 100 resin at  
574 4°C. The media was subsequently filtered and 0.025% tyloxapol and metal supplements were  
575 added as stated.

576

577 **RNA-sequencing library preparation**

578 Total DNA-free RNA sample was depleted of bacteria rRNA with Ambion's MICROBExpress kit as  
579 per the manufacturer's instructions. Total bacterial RNA ~1 µg was processed using Truseq  
580 Stranded Total RNA seq protocol (Illumina Inc). Depletion of Bacterial rRNA was done using  
581 biotinylated, target specific oligos combined with Ribo-Zero Gold rRNA removal beads. The rRNA  
582 depleted total RNA was purified, fragmented and primed for cDNA 1st- and 2nd-strand synthesis  
583 followed by A-tailing and ligation of adapters with multiplexing indexes. The products were amplified  
584 with 15 PCR cycles and purified using Agencourt AMPure XP magnetic beads (Beckman Coulter,  
585 Brea, CA, USA) according to the manufacturer's instructions. The quality of cDNA libraries was  
586 checked with Agilent DNA1000 chips (2100 Bioanalyzer; Agilent Technologies). 300x2 bp paired  
587 end sequencing was performed using V3 flow cell on Illumina MiSeq. A total of 23 million reads  
588 were generated for the three biological samples (each in triplicates)

589

590 **RNA- sequencing data analysis**

591 *Mycobacterium tuberculosis* genome and its annotations (gff/fna/ptt/rnt) were downloaded using an  
592 R package, Progenome (v0.0.7) (1) and the gist used for extraction is in the following reference (2).  
593 Further, raw reads were quality trimmed using Trim-Galore (v0.6.4) (3) and the resulting trimmed  
594 reads were aligned using Salmon (v0.14.1) (4) and estimated differential gene expression using  
595 DESeq2 (v1.26.0) (5) after filtering genes with count of 5 or more for at least 4 or more samples.  
596 For predicting the operons from the RNA-Seq data we used Rockhopper (v2.03) (6) and used  
597 ComplexHeatmap (v2.2.0) (7) for plotting the expression of genes in operons.

598

599 **Gene expression analysis by qRT-PCR**

600 Using NucleoSpin RNA kit, total RNA from desired cultures of the indicated strains of *Mtb* were  
601 isolated from 5 mL cultures as per manufacturer's instruction. Using the PrimeScript First Strand  
602 cDNA Synthesis Kit (Takara Bio), cDNA was generated from 1 µg of total RNA from each specified  
603 sample. RT-qPCR reactions were prepared using 1 µL of cDNA reaction mixture for each gene-  
604 specific primer per reaction with SYBR Green Master Mix (Applied Biosystems) as per the  
605 manufacturer's instruction in a Roche LightCycler 480 instrument II. Template normalization was  
606 performed by dividing the absolute gene expression of specific genes by the absolute gene  
607 expression of 16S rRNA. The sequences of primers used for qRT-PCR are provided in SI Table 1.  
608 Reactions without the cDNA were used as no-template negative control.

609

610 **Generation of  $\Delta nrps$  and  $\Delta nrps:nrps$  *Mtb* strains**

611 The *nrps* deletion strain was constructed by two step homologous recombination as previously  
612 described (8). A suicide vector was constructed by amplifying the regions upstream and  
613 downstream of the gene to create an unmarked deletion using primer pairs EUF20/EUR20 and

614 EUF21/EUR21, cloning into p2NIL and adding the selection cassette from pGOAL19 (*sacB*, *lacZ*,  
615 *hyg*, *kan*). Single crossovers were isolated on kanamycin and hygromycin after electroporation  
616 with 5 µg of plasmid DNA. Double cross overs were isolated by negative selection on sucrose and  
617 screening for lack of LacZ activity. The deletion strain was identified using PCR amplification and  
618 confirmed by Southern blotting. For generation of  $\Delta nrps:nrps$  *Mtb* strain, a 28-kb *Mtb* H37Rv cosmid  
619 fragment (spanning genomic position 104933 bp to 133536 bp) packaged in the integrative shuttle  
620 cosmid vector pYUB412-Kan (shared by Dr. Apoorva Bhatt) was introduced into the  $\Delta nrps$  strain  
621 by electroporation, and kanamycin-resistant transformants were confirmed by PCR amplification.  
622 This recombinant cosmid spans a region that extends from Rv0096 to Rv0109.

623

#### 624 **Determination of total metal ions in *in vitro* bacterial cultures**

625 Total metal concentrations were measured by ICP-MS. Briefly 0.8-1.0 OD WT *Mtb* cultures grown  
626 in chelated Sauton's medium with 0.025% tyloxapol supplemented with ZnSO<sub>4</sub> were spun down  
627 and washed with 1X PBS 3 times. Subsequently cells were subjected to lysis by boiling in 0.1%  
628 SDS and 0.2% HNO<sub>3</sub> for 15 minutes in trace-element free 1.5 ml micro-centrifuge tubes. Volume  
629 were made up to 1 ml using MS grade water and samples were filtered through 0.2 µ PTFE syringe  
630 filters before running on ICP-MS (ThermoXcaliber II). For comparative metal content analysis of  
631  $\Delta nrps$  with WT and  $\Delta nrps:nrps$  *Mtb* strains, log phase cultures from 7H9 were spun down and  
632 washed with 1X PBS thrice. *Mtb* strains were then grown in chelated Sauton's medium with 0.025%  
633 tyloxapol supplemented with either low- or high-zinc for one generation time. Cells were  
634 subsequently lysed and ICP-MS was performed as described above. Absolute part per billions  
635 (ppb) counts were normalized to protein concentration estimated for each sample and are plotted.

636

#### 637 **Cell culture and infection**

638 The murine immortalized bone marrow derived macrophage cell line RAW 264.7 (source, European  
639 Collection of Authenticated Cell Cultures) was cultured in Dulbecco's modified Eagle's medium  
640 (DMEM) with 2 mM L-glutamine and 10% fetal calf serum (FCS) (Gibco) at 37°C under 5% CO<sub>2</sub>.  
641 Cells were routinely collected by scraping. Cells were seeded at required density a day before  
642 infection. Cells were infected with either mCherry labelled WT,  $\Delta nrps$  and  $\Delta nrps:nrps$  *Mtb* at a  
643 multiplicity of infection (MOI) of 5 bacteria per cell (for imaging and ICP-MS studies) and MOI = 50  
644 for mRNA expression studies of intracellular bacteria for 4 hours. After bacterial challenge, medium  
645 was changed to antibiotic containing one for 20 mins to get rid of extracellular bacteria. Cultures  
646 were then subsequently maintained in antibiotic free medium for indicated time points.

647

#### 648 **Determination of total zinc in macrophage infection studies**

649 Total metal concentrations were measured by ICP-MS. At indicated time points, macrophage were  
650 lysed with 0.05% SDS (in M.S grade water) and spun down at 4000 rpm for 8 minutes. Supernatant  
651 was collected separately to measure macrophage total metal content while the bacterial pellet was  
652 subjected to lysis by boiling in 0.1% SDS and 0.2% nitric acid for 15 minutes in trace-element free  
653 1.5ml micro-centrifuge tubes. Volume were made up to 1 ml using MS grade water and samples  
654 were filtered before running on ICP-MS (Thermo Xcaliber II). Absolute ppb counts were normalized  
655 to protein concentration estimated for each sample and plotted.

656

#### 657 **Determination of free zinc in macrophage infection studies**

658 Macrophage cultures uninfected or infected with mCherry labelled *Mtb* strains were washed with  
659 PBS and incubated with 0.5 µM Fluozin 3-AM for 30 minutes at room temperature. After 30 minutes  
660 cells were washed with PBS to remove dye remnants. Cells loaded with FZ3-AM dye were then  
661 incubated in 1X PBS for another 30 mins at 37 °C. PBS was subsequently removed after incubation

662 and cells were fixed with 4% paraformaldehyde in 1X PBS. Fixed cells were then mounted with  
663 DAPI. DAPI-positive, mCherry-positive and FZ3 green-positive cells were selected for each of the  
664 triplicate samples by confocal microscopy using Zeiss LSM980 and mean pixel intensity for FZ3  
665 signals was analyzed using ImageJ.

666

### 667 **Computational analysis**

668 10,932 whole bacterial genomes were downloaded in FASTA (.fna) format from RefSeq. The  
669 genomes spanned 1021 unique genera, and 2854 unique species. The dataset was non-redundant  
670 at strain level. The genomes were run through antiSMASH 4. The NRPS biosynthetic gene cluster  
671 containing GenBank (.gbk) files were extracted and converted to FASTA (.fa) format using an in-  
672 house script. These NRPS biosynthetic gene clusters were searched for all HotDog-fold  
673 (thioesterase) clan (Pfam: CL0050) family pHMMs alongside presence of TauD (Pfam: PF02668).  
674 Except FcoT (Pfam: PF10862) family containing biosynthetic gene clusters none of the other  
675 thioesterase families had an organization similar to the NRPS biosynthetic gene cluster. Hence,  
676 only FcoT containing biosynthetic gene clusters were used for further analysis. A representative  
677 dataset of 73 genomes was picked up from the putative NRPS biosynthetic gene cluster containing  
678 genomes. Among these genomes, we searched for *nrps* genes in which the first condensation  
679 domain (C1') was not being picked up by Pfam pHMMs. C-domains being detected by Pfam  
680 pHMMs were labelled C2. The sequences for all these condensation domains were subjected to  
681 Multiple Sequence Alignment (MSA) using Clustal Omega. The cladogram for these MSA  
682 sequences was constructed using iTOL.

683

### 684 **Cloning, expression and purification**

685 Rv0097, Rv0098 and Rv0052 were PCR amplified with template from BAC clone library using KOD  
686 polymerase from TOYOBO on Veriti thermal cycler. Amplification conditions for genes were, initial  
687 denaturation: 94°C for 2 minutes, denaturation: 94°C for 15 seconds, annealing: 62°C for 45  
688 seconds and elongation: 68°C for 2 minutes. Amplified genes were further cloned in pET- 28c  
689 expression vector using NdeI and HindIII (NEB) restriction enzymes and T4 DNA ligase (NEB).  
690 Rv0097, Rv0098 and Rv0052 were expressed and purified as His tagged protein from E. coli BL21  
691 (DE3) competent cells. In brief, 2 L LB media for each protein was inoculated with respective  
692 overnight grown starter culture. Once OD reached 0.6 at 37°C, cultures were induced with 0.5 mM  
693 and kept at 30°C for 6 to 8 hours. Cells were spun down, washed, and resuspended in lysis buffer  
694 (pH-7.5, 50 mM Tris-HCl, 150 mM NaCl, 10% glycerol). Cells were centrifuged to remove cell  
695 debris and supernatants were incubated for 1 hour with Ni-NTA agarose resin beads at 4°C. The  
696 mixture was loaded onto a column using gravity flow. The resin was washed with wash buffer (50  
697 mM Tris pH 8.0, 10% glycerol) till the unbound proteins were removed. The protein was eluted  
698 using elution buffers containing increasing concentration of imidazole. Fractions containing the  
699 proteins of interest were pooled and 1 mM TCEP was added and stored at -80°C.

700

### 701 **Biochemical assays of Rv0097, Rv0098 and Rv0052**

702 Enzymatic reactions were set up at pH-7.5 (Tris-HCl) with 200 mM glycine, 5 mM (C4, C8 or C12-  
703 NAC) substrate and 50 µM enzyme- Rv0098 or 400 µM iron sulphate and 500 µM alpha-  
704 ketoglutarate and 4 mM ascorbate with 50 µM Rv0098 and Rv0097 each. Reactions were mixed  
705 gently and kept at 30°C for 6 hours. For biochemical characterization of Rv0052, to the above  
706 reaction mix of Rv0098 and Rv0097, 50 µM Rv0052 was additionally added. For each assay set,  
707 no-protein control reactions were also set. With equal volume of ethyl acetate, reaction products  
708 were extracted and dried. High resolution LC-MS analysis was performed using a Gemini 5U C-18  
709 column (Phenomenex, 5 µm, 50 x 4.6 mm) using solvents, flow rates and MS parameters described



710 earlier on a Sciex X500R Quadrupole Time Of Flight (QTOF) mass spectrometer fitted with an  
711 ExionLC UPHLC system.

712

### 713 **Extraction and analysis of kupyaphores from *Mtb* cultures**

714 The organic layer collected from ethyl acetate based small molecule extraction of *Mtb* cultures was  
715 separated and evaporated to dryness. The residual material was dissolved in minimal volume of  
716 methanol and analyzed by an information dependent acquisition (IDA) scanning on a Sciex X500R  
717 QTOF mass spectrometer fitted with an ExionLC UPHLC system using the SciexOS software as  
718 per previously described method (9-10). The LC separation was achieved on a Gemini 5U C18  
719 column (Phenomenex, 5  $\mu$ m, 50 x 4.6 mm) coupled to a Gemini guard column (Phenomenex, 4 x  
720 3 mm, Phenomenex security cartridge). All metabolites corresponding to kupyaphore species **I** to  
721 **VII** were analyzed by IDA scanning in both positive and negative ionization mode using an  
722 electrospray ionization (ESI) source with solvent systems, flow rates and a solvent gradient  
723 described earlier. The total scan time for both the MS1 and MS2 spectra was 2.5 s and the collision  
724 energy (volts) of 50 was used. The declustering potential and ion source voltage were set at 100  
725 and 5500 volts respectively.

726

### 727 **Click chemistry of *Mtb* culture extract with tetrazine**

728 Dry extracts of WT *Mtb* biofilm culture were redissolved in 400  $\mu$ L methanol, to which 100 mM 3,6-  
729 Di-2-pyridyl-1,2,4,5-tetrazine in dichloromethane was added to a final concentration of 10 mM. The  
730 mixture was stirred at room temperature for 3 hours. The universal product was separated and  
731 analyzed using previously described method (11).

732

### 733 **Acid catalyzed hydrolysis for isonitrile functional group confirmation**

734 Ethyl acetate metabolite extracts of WT *Mtb* biofilm culture were treated with formic acid (5% v/v)  
735 for 4 hours at room temperature. Extracted ion analysis was performed for the parent lipopeptide  
736 peak (m/z for [M+H]<sup>+</sup> ion 848.6987) and synthesized  $\beta$ -amine lipopeptide (m/z for [M+H]<sup>+</sup> ion  
737 828.7300) using the LC-MS protocol described in the earlier section.

738

### 739 **Mouse Infection studies**

740 Six to eight-week-old female Balb/c mice were housed in individually ventilated cages at the animal  
741 house facility (TACF) of ICGEB, New Delhi, India. Mice were infected with indicated *Mtb* strain by  
742 aerosol route to implant nearly 200 CFU per lung. Deposition of bacterium inside lung was  
743 assessed by sacrificing three mice 24 hours post infection and plating the lungs homogenates in  
744 triplicates on 7H11-OADC agar plates. Bacillary loads in lung were evaluated at different time points  
745 after aerosol infection to follow the course of infection. A part of the lung was used for metabolite  
746 analysis. At each time point, corresponding uninfected mice were taken as controls.

747

### 748 **Extraction and analysis of *Mtb* metabolites from mouse infection studies**

749 For *Mtb* metabolite extraction from mice, 0.1 g of lung tissue were taken from left apical lobe of  
750 uninfected and infected mice at indicated time points. 5 times the volume of ethyl acetate was  
751 added. The sample were then homogenized using 0.5  $\mu$  zirconium bead in a bead beater. The  
752 organic layer was collected, transferred to fresh tube, dried and subjected to targeted LC-HRMS  
753 studies. All the species analyzed were quantified using the multiple reaction monitoring high  
754 resolution (MRM-HR) LC-MS method on a Sciex X500R QTOF mass spectrometer fitted with an  
755 ExionLC UHPLC system. All data was collected and analyzed using the SciexOS software. All  
756 metabolite estimations were performed using an ESI source, with the following MS parameters:  
757 curtain gas = 20 L/min, ion spray voltage = 5500 V, temperature = 500  $^{\circ}$ C.

758 **Supernatant exchange for  $\Delta nrps$  growth rescue**

759  $\Delta nrps$  *Mtb* strain was inoculated in Sauton's medium at starting OD of 0.02. After one generation  
760 time, culture were spun down and medium was removed. The cells were then resuspended in either  
761 fresh Sauton's medium or in supernatant collected after spinning down WT *Mtb* cells grown in  
762 Sauton's medium for 7 days. Growth was then monitored in both the conditions by measuring  
763 optical density at 600 nm for 6 days.

764  
765 **Radioactive zinc 65 uptake assay**

766 Logarithmic cultures of WT,  $\Delta nrps$  and  $\Delta nrps:nrps$  *Mtb* strains were spun down and washed thrice  
767 with 1X PBS. Equal number of cells were then incubated with 0.5  $\mu$ M of radioactive zinc-65 for 4  
768 hours. After 4 hours, cells were spun down and washed once with 1X PBS to get rid of exogenous  
769 zinc 65. Subsequently cells were lysed in 1X PBS supplemented with 5% glycerol by bead beating  
770 for 3 cycles. The supernatant was then collected and spotted on blotting sheet. Intracellular  
771 radioactive count was then measured by autoradiography and quantitated using ImageJ analysis.  
772 Mean pixel intensity so obtained was then normalized to protein content estimated by BCA for each  
773 sample.

774  
775 **Selection criteria for TB patients and isolation of clinical *Mtb* strains from TB patients**

776 The initial assessment of bone/pulmonary TB patients was done by doctors on the basis of clinical  
777 suspicion. The symptoms included weight loss, persistent pain, cough and bone damage near  
778 pathogenic foci. TB subjects were then tested by chest X-ray, sputum culture test, radiological  
779 examination of infected tissue and by microscopic examination for bacterial presence by acid-fast  
780 bacilli (AFB) staining. HIV infected subjects and patients undergoing anti tubercular therapy were  
781 excluded from the study. The pulmonary mycobacterial strains were isolated from sputum of  
782 infected subjects. Mycobacterial strains from bone were isolated from infected skeletal tissue. The  
783 infected tissue was then lysed with 4% NaOH and inoculated onto LJ slants. The slants were then  
784 incubated at 37°C until visible colonies were observed.

785  
786 ***Mtb* metabolite extraction and analysis from clinical *Mtb* strains isolated from TB patients**

787 Colonies grown on LJ slant were scraped and collected. 5 times the volume of ethyl acetate was  
788 added. The organic layer was collected, transferred to fresh tube, dried and subjected to targeted  
789 LC-HRMS studies as described previously. All the species analyzed were quantified using the  
790 multiple reaction monitoring high resolution (MRM-HR) LC-MS method on a Sciex X500R QTOF  
791 mass spectrometer fitted with an ExionLC UHPLC system. All data was collected and analyzed  
792 using the SciexOS software. All metabolite estimations were performed using an ESI source, with  
793 the following MS parameters: curtain gas = 20 L/min, ion spray voltage = 5500 V, temperature =  
794 500 °C.

795  
796 **Statistical Analysis**

797 GraphPad Prism 8 software was used for statistical analysis. Statistical significance was analyzed  
798 by Student's t-test or one-way or two-way ANOVA with  $p > 0.05$  (not significant),  $*p < 0.05$ , and  
799  $**p < 0.01$   $***p < 0.005$  when applicable. Data were plotted as the mean, with error bars representing  
800 SEM of three biological replicates. Schematic diagrams were adapted from biorender.com.

801  
802 **Chemical Synthesis of *N*-acetyl cysteamine thioester of 2-dodecenoic acid**

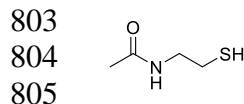

806 ***N*-(2-mercaptoethyl)acetamide (03):** Compound (03) was synthesized by following reported  
807 procedure.<sup>1</sup>

808 **IR  $\nu_{\max}$  (film):** 3285, 1645, 1550, 1371, 1292  $\text{cm}^{-1}$

809  **$^1\text{H NMR}$  (400 MHz,  $\text{CDCl}_3$ )**  $\delta$  6.48 (bs, 1H), 3.39 – 3.35 (m, 2H), 2.65 – 2.59 (m, 2H), 1.96 (s, 3H),  
810 1.37 (t,  $J = 8.5$  Hz, 1H).  **$^{13}\text{C NMR}$  (100 MHz,  $\text{CDCl}_3$ )**  $\delta$  170.59, 42.57, 24.53, 23.20.

811

812

813

814

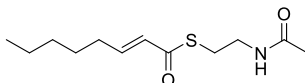

815 ***(E)*-2-octenoyl-acyl-*N*-acetylcysteamine (04):** Compound (04) was synthesized by following  
816 reported procedure.<sup>2,3</sup>

817 **IR  $\nu_{\max}$  (film):** 3285, 2925, 1644, 1546, 1368, 1286, 1019, 807  $\text{cm}^{-1}$

818  **$^1\text{H NMR}$  (400 MHz,  $\text{CD}_3\text{OD}$ )**  $\delta$  6.94 (dt,  $J = 15.2, 7.0$  Hz, 1H), 6.18 (d,  $J = 15.5$  Hz, 1H), 3.36 (t,  $J =$   
819 6.7 Hz, 2H), 3.08 (t,  $J = 6.7$  Hz, 2H), 2.24 (td,  $J = 8.0, 1.1$  Hz, 2H), 1.94 (s, 3H), 1.50 (dt,  $J = 14.3,$   
820 7.3 Hz, 2H), 1.35 (m, 4H), 0.94 (t,  $J = 6.8$  Hz, 3H).  **$^{13}\text{C NMR}$  (100 MHz,  $\text{CD}_3\text{OD}$ )**  $\delta$  189.59, 172.02,  
821 146.14, 128.12, 38.84, 31.71, 31.11, 27.50, 27.45, 22.08, 21.10, 12.93.

822 **HRMS (ESI):**  $m/z$  calculated for  $\text{C}_{12}\text{H}_{22}\text{O}_2\text{NS}$   $[\text{M}+\text{H}]^+$  244.1366 observed 244.1365.

823

824

825

826

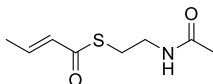

827 ***S*-(2-acetamidoethyl) (*E*)-but-2-enoate (05):** Compound (05) was synthesized by following  
828 reported procedure.<sup>2</sup>

829 **IR  $\nu_{\max}$  (film):** 3282, 1646, 1547, 1437, 1286, 1046, 812  $\text{cm}^{-1}$

830  **$^1\text{H NMR}$  (400 MHz,  $\text{CDCl}_3$ )**  $\delta$  6.93 (dq,  $J = 20.9, 6.9$  Hz, 1H), 6.19 – 6.12 (m, 1H), 6.07 (bs, 1H),  
831 3.45 (dd,  $J = 11.9, 5.9$  Hz, 2H), 3.08 (t,  $J = 6.4$  Hz, 2H), 1.96 (s, 3H), 1.89 (dd,  $J = 6.8, 1.2$  Hz, 3H).

832 **HRMS (ESI):**  $m/z$  calculated for  $\text{C}_8\text{H}_{14}\text{O}_2\text{NS}$   $[\text{M}+\text{H}]^+$  188.0740 observed 188.0739.

833

834

835

836

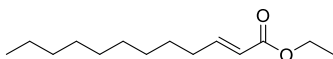

837 **Ethyl (*E*)-dodec-2-enoate (08):** Compound (08) was synthesized by following reported  
838 procedure.<sup>4</sup>

839 **IR  $\nu_{\max}$  (film):** 2925, 2855, 1721, 1655, 1461, 1265, 1180, 981, 750  $\text{cm}^{-1}$

840  **$^1\text{H NMR}$  (200 MHz,  $\text{CDCl}_3$ )**  $\delta$  6.95 (dt,  $J = 15.4, 6.9$  Hz, 1H), 5.79 (d,  $J = 15.6$  Hz, 1H), 4.17 (q,  $J =$   
841 7.1 Hz, 2H), 2.17 (q,  $J = 6.3$  Hz, 2H), 1.56 – 1.19 (m, 17H), 0.86 (t,  $J = 6.2$  Hz, 3H).

842 **HRMS (ESI):**  $m/z$  calculated for  $\text{C}_{14}\text{H}_{27}\text{O}_2$   $[\text{M}+\text{H}]^+$  227.2006 observed 227.2004.

843

844

845

846

847

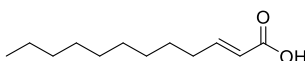

848 ***(E)*-dodec-2-enoic acid (09):** Compound (09) was synthesized by following reported procedure.<sup>5</sup>

849 **IR  $\nu_{\max}$  (film):** 2924, 1694, 1286, 753  $\text{cm}^{-1}$

850  **$^1\text{H NMR}$  (400 MHz,  $\text{CDCl}_3$ )**  $\delta$  7.08 (dt,  $J = 15.6, 7.0$  Hz, 1H), 5.82 (dt,  $J = 15.6, 1.5$  Hz, 1H), 2.25 –  
851 2.19 (m, 2H), 1.50 – 1.42 (m, 2H), 1.26 (s, 12H), 0.88 (t,  $J = 6.9$  Hz, 3H).  **$^{13}\text{C NMR}$  (100 MHz,  
852  $\text{CDCl}_3$ )**  $\delta$  172.46, 152.68, 120.76, 32.47, 32.01, 29.62, 29.52, 29.43, 29.29, 28.02, 22.81, 14.24.

853

854

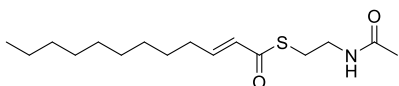

855

856

857 **S-(2-acetamidoethyl) (E)-dodec-2-enethioate (10):** (*E*)-dodec-2-enoic acid (09) (0.858 g; 4.33  
858 mmol) was added to 15 mL of DMF at 0 °C and treated with diphenylphosphoryl azide (DPPA)  
859 (0.930 mL; 4.3 mmol) and triethylamine (1.11 mL; 7.9 mmol) for 2 h. *N*-(2-mercaptoethyl)acetamide  
860 (03) (0.430 g; 3.61 mmol) in 5 ml DMF was added to the solution and stirred at room temperature  
861 for overnight. The reaction was quenched with 50 mL of ice-cold water and exacted twice with ethyl  
862 acetate. The organic phase was combined, dried, and evaporated, and *S*-(2-acetamidoethyl) (*E*-  
863 dodec-2-enethioate was purified with silica gel (100-200 mesh) chromatography to give 485 mg  
864 (45% yield) of pale yellow solid.<sup>6</sup>

865 **IR**  $\nu_{\max}$  (film): 3282, 2923, 2856, 1660, 1547, 1451, 1287, 977, 808  $\text{cm}^{-1}$

866 **<sup>1</sup>H NMR (400 MHz, CDCl<sub>3</sub>)**  $\delta$  6.91 (dt, *J* = 15.5, 6.9 Hz, 1H), 6.10 (dt, *J* = 15.5, 1.4 Hz, 1H), 6.07  
867 (bs, 1H), 3.44 (dd, *J* = 12.4, 6.2 Hz, 2H), 3.07 (t, *J* = 6.4 Hz, 2H), 2.21 – 2.15 (m, 2H), 1.95 (s, 3H),  
868 1.48 – 1.41 (m, 2H), 1.24 (s, 14H), 0.86 (t, *J* = 6.8 Hz, 3H). **<sup>13</sup>C NMR (100 MHz, CDCl<sub>3</sub>)**  $\delta$  190.56,  
869 170.50, 146.96, 128.35, 39.93, 32.36, 31.96, 29.56, 29.46, 29.37, 29.27, 28.31, 28.01, 23.31,  
870 22.76, 14.21.

871 **HRMS (ESI):** *m/z* calculated for C<sub>16</sub>H<sub>30</sub>O<sub>2</sub>NS [M+H]<sup>+</sup> 300.1992 observed 300.1989.

872

### 873 **Chemical Synthesis of $\beta$ -amine substituted lipopeptide**

874

875

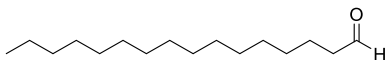

876

877

878 **Hexadecanal (12):** Compound **12** was prepared by following the literature procedure.<sup>7</sup>

879 **Yield-** 85 % as a white solid.

880

881

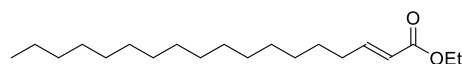

882

883

884 **Ethyl (E)-octadec-2-enoate (13):** Compound **13** was prepared by following the literature  
885 procedure.<sup>8</sup>

886 **Yield-** 90 % as a colorless oil.

887

888

889

890

891

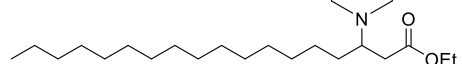

892

893

894 **Ethyl 3-(dibenzylamino) octadecanoate (14):** Dibenzylamine 18.56 mL (96.61 mmol) was added  
895 in THF (150 mL) at -78 °C followed by drop wise addition of *n*-butyl lithium 66.41 mL (106.26 mmol,  
896 1.6 M in Hexane) over a period of 15 min under inert condition. Ethyl (*E*)-octadec-2-enoate **13** (15  
897 g, 48.30 mmol) in THF (50 mL) was added after 30 min. The resulting solution was stirred at -78  
898 °C for 4 h. The reaction mixture was quenched with saturated ammonium chloride and extracted  
899 with ethyl acetate (3 x 70 mL). The combined organic extracts were dried over anhydrous sodium  
900 sulphate, filtered, and concentrated in *vacuo*. The organic residue was purified by column  
901 chromatography to afford Ethyl 3-(dibenzylamino) octadecanoate **14** (16.2 g, yield-66 %) as a pale  
902 yellow oil.<sup>9</sup>

903 **IR**  $\nu_{\max}$  (thin film): 2923, 2852, 1734, 1454, 1367, 1178  $\text{cm}^{-1}$ .

904 **<sup>1</sup>H NMR (400 MHz, CDCl<sub>3</sub>):** δ 7.35 – 7.19 (m, 10H), 4.14 (dq, *J* = 10.7, 7.1 Hz, 1H), 4.03 (dq, *J* =  
905 10.7, 7.1 Hz, 1H), 3.62 (d, *J* = 13.6 Hz, 2H), 3.49 (d, *J* = 13.6 Hz, 2H), 3.08 (p, *J* = 7.0 Hz, 1H), 2.64  
906 (dd, *J* = 13.7, 6.5 Hz, 1H), 2.25 (dd, *J* = 13.7, 7.4 Hz, 1H), 1.67 (dq, *J* = 12.0, 7.2 Hz, 2H), 1.27 (s,  
907 26H), 1.20 (t, *J* = 7.1 Hz, 3H), 0.89 (t, *J* = 6.8 Hz, 3H); **<sup>13</sup>C NMR (100 MHz, CDCl<sub>3</sub>):** δ 173.16,  
908 140.09, 129.11, 128.21, 126.95, 60.44, 55.56, 53.52, 35.78, 32.08, 30.68, 29.86, 29.83, 29.78,  
909 29.74, 29.61, 29.52, 26.81, 22.85, 14.28.

910 **HRMS (ESI):** *m/z* calculated for C<sub>34</sub>H<sub>50</sub>O<sub>2</sub>N [M+H]<sup>+</sup> 508.4149 observed 508.4152.

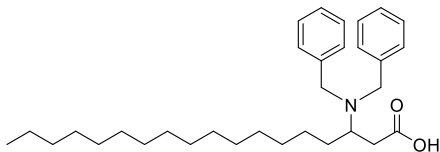

911  
912  
913  
914  
915  
916  
917  
918 **3-(dibenzylamino) octadecanoic acid (15):** Ethyl 3-(dibenzylamino) octadecanoate **14** (16 g,  
919 31.50 mmol) was dissolved in a mixture of solvents THF, ethanol and water in a ratio of (3:2:1)  
920 followed by addition of NaOH (7.56 g, 189.00 mmol) at 0 °C. The resulting solution was stirred at  
921 room temperature for 6 h and completion of reaction was monitored by TLC. The reaction mass  
922 was concentrated and adjusted the pH of reaction mass at ~ 3-4 and extracted with ethyl acetate  
923 (2 x 100 mL). The combined organic layer was dried over anhydrous sodium sulphate, filtered and  
924 concentrated in *vacuo*. The organic residue was purified by column chromatography to afford 3-  
925 (dibenzylamino) octadecanoic acid **15** (8.50 g, yield-80 % brsm) as yellowish oil.

926 **IR**  $\nu_{\max}$  (thin film): 3028, 2922, 2852, 1709, 1456, 1377 cm<sup>-1</sup>.

927 **<sup>1</sup>H NMR (200 MHz, CDCl<sub>3</sub>):** δ 7.26 – 7.19 (m, 10H), 3.93 (d, *J* = 13.0 Hz, 2H), 3.37 (d, *J* = 13.0 Hz,  
928 2H), 3.01 (d, *J* = 4.0 Hz, 1H), 2.51 – 2.27 (m, 2H), 1.65 (dt, *J* = 12.5, 8.0 Hz, 1H), 1.20 (s, 27H),  
929 0.79 (t, *J* = 6.5 Hz, 3H); **<sup>13</sup>C NMR (100 MHz, CDCl<sub>3</sub>):** δ 173.26, 135.08, 129.89, 129.10, 128.48,  
930 55.18, 52.81, 33.83, 32.06, 29.83, 29.80, 29.75, 29.72, 29.66, 29.56, 29.50, 26.82, 26.69, 22.82,  
931 14.25.

932 **HRMS (ESI):** *m/z* calculated for C<sub>32</sub>H<sub>50</sub>O<sub>2</sub>N [M+H]<sup>+</sup> 480.3836 observed 480.3839.

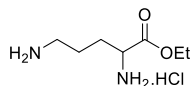

933  
934  
935  
936  
937  
938 **Ethyl 2, 5-diaminopentanoate (17):** Compound **17** was prepared by following the literature  
939 procedure.<sup>12</sup>

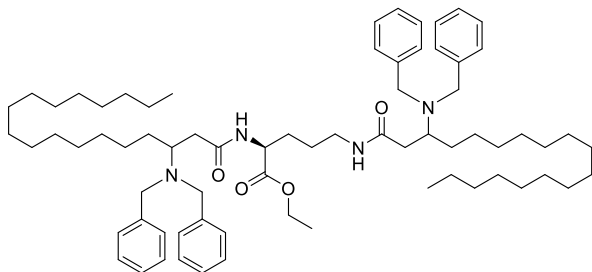

940  
941  
942  
943  
944  
945  
946  
947  
948  
949 **Ethyl 2, 5-bis(3-(dibenzylamino)octadecanamido)pentanoate (18):** 3-(dibenzylamino)  
950 octadecanoic acid **15** (6.098 g, 12.711 mmol) was dissolved in dry DMF (30 mL) at 0 °C. HATU  
951 (4.833 g, 12.711 mmol) and *N,N*-diisopropylethylamine (4.428 mL, 25.422 mmol) were added  
952 accordingly. After 10 min ethyl 2, 5-diaminopentanoate **17** (1 g, 5.084 mmol) was added. The  
953 temperature of reaction mixture was maintained at 0 °C for 2 h. After completion, the reaction  
954 mixture was diluted with ethyl acetate and washed with saturated brine solution (1 x 50 mL) and  
955 water (2 x 25 mL). The resulting organic layer was dried over anhydrous sodium sulphate, filtered,

956 and concentrated in vacuo. The organic residue was purified by column chromatography to afford  
957 Ethyl 2, 5-bis (3-(dibenzylamino)octadecanamido)pentanoate **18** (5 g, yield- 91%) as a colorless  
958 oil.<sup>10</sup>

959 **IR**  $\nu_{\max}$  (thin film): 3298, 2923, 1738, 1646, 1539, 1454  $\text{cm}^{-1}$ .

960 **<sup>1</sup>H NMR (400 MHz, CDCl<sub>3</sub>)**:  $\delta$  7.34 – 7.18 (m, 20H), 4.49 (dd,  $J$  = 13.1, 7.0 Hz, 1H), 4.24 – 4.10 (m,  
961 2H), 3.74 – 3.69 (m, 2H), 3.59 (ddd,  $J$  = 18.2, 13.6, 6.7 Hz, 4H), 3.42 (dd,  $J$  = 13.2, 3.3 Hz, 2H),  
962 3.24 – 3.02 (m, 2H), 2.94 – 2.66 (m, 2H), 2.64 – 2.43 (m, 2H), 2.24 – 2.11 (m, 1H), 1.68 (m, 4H),  
963 1.47 – 1.39 (m, 1H), 1.26 (d,  $J$  = 2.0 Hz, 59H), 0.88 (t,  $J$  = 6.8 Hz, 6H); **<sup>13</sup>C NMR (100 MHz, CDCl<sub>3</sub>)**:  
964 (characteristic peaks)  $\delta$  172.46, 172.36, 172.28, 139.64, 139.37, 139.19, 129.47, 129.24, 128.58,  
965 127.48, 127.11, 61.42, 56.30, 55.75, 53.69, 52.49, 38.59, 36.89, 36.61, 32.06, 30.51, 29.85, 28.25,  
966 27.31, 26.94, 26.31, 22.83, 14.33.

967 **HRMS (ESI)**:  $m/z$  calculated for C<sub>71</sub>H<sub>111</sub>O<sub>4</sub>N<sub>4</sub> [M+H]<sup>+</sup> 1083.8600 observed 1083.8602.

968

969

970

971

972

973

974

975

976

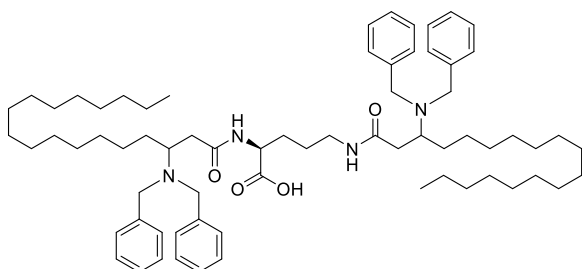

977 **2, 5-bis(3-(dibenzylamino)octadecanamido)pentanoic acid (19)**: Ethyl 2,5-bis(3-  
978 (dibenzylamino)octadecanamido)pentanoate **18** (5.0 g, 4.613 mmol) was dissolved in a mixture of  
979 solvents THF, ethanol and water in a ratio of (3:2:1) at 0 °C. followed by addition of NaOH (1.107  
980 g, 27.683 mmol) at same temperature. The resulting solution was stirred at room temperature for  
981 6 h, completion of reaction was monitored by TLC. The reaction mass was concentrated and the  
982 pH was adjusted at ~ 3-4 by 1N HCl. Extracted with ethyl acetate (2 x 50 mL). The combined  
983 organic layer was dried over anhydrous sodium sulphate, filtered and concentrated in *vacuo*. Crude  
984 (organic residue) was forwarded into next step without purification.

985

986

987

988

989

990

991

992

993

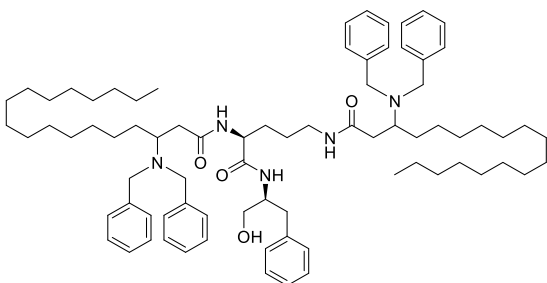

994 **N,N-(5-((1-hydroxy-3-phenylpropan-2-yl)amino)-5-oxopentane-1,4-diyl)bis(3-**  
995 **(dibenzylamino)octadecanamide) (21)**: 2,5-bis(3-(dibenzylamino)octadecanamido)pentanoic  
996 acid **19** (4.0 g, 3.789 mmol) was dissolved in DMF (5 mL) at 0 °C. HATU (2.881 g, 7.578 mmol)  
997 and *N,N*-diisopropylethylamine (1.98 mL, 11.367 mmol) were added to it. After 10 min, (*S*)-2-  
998 amino-3-phenylpropan-1-ol **20** (0.716 g, 4.736 mmol) was added. The temperature of reaction  
999 mixture was maintained at 0 °C for 2 h. After completion, the reaction mixture was diluted with ethyl  
1000 acetate and washed with saturated brine (50 mL) and water (2 x 50 mL). The resulting organic layer  
1001 was dried over anhydrous sodium sulphate, filtered, and concentrated in *vacuo*. The organic  
1002 residue was purified by column chromatography to afford *N,N*-(5-((1-hydroxy-3-phenylpropan-2-  
1003 yl) amino)-5-oxopentane-1,4-diyl)bis(3-(dibenzylamino)octadecanamide) **21** (3.4 g, yield- 76 %) as  
1004 a yellowish sticky oil.<sup>10</sup>

1005 **IR**  $\nu_{\max}$  (thin film): 3277, 2954, 2361, 1648, 1540, 1457  $\text{cm}^{-1}$ .

1006 **<sup>1</sup>H NMR (400 MHz, CDCl<sub>3</sub>)**  $\delta$  7.32 – 7.15 (m, 25H), 4.55 – 4.44 (m, 1H), 4.11 (s, 1H), 3.74 – 3.49  
1007 (m, 8H), 3.38 (d,  $J$  = 10.7 Hz, 2H), 3.06 – 2.80 (m, 5H), 2.59 – 2.15 (m, 5H), 1.83 – 1.59 (m, 4H),

1008 1.27 (s, 56H), 0.88 (t,  $J = 6.4$  Hz, 6H);  $^{13}\text{C}$  NMR (100 MHz,  $\text{CDCl}_3$ ) (characteristic peaks)  $\delta$   
1009 176.09, 173.76, 172.55, 138.65, 138.24, 129.40, 128.73, 128.41, 127.70, 127.12, 126.45, 63.80,  
1010 63.23, 56.23, 55.97, 55.52, 53.70, 53.60, 53.44, 53.22, 52.02, 51.66, 37.72, 37.67, 37.65, 37.05,  
1011 36.64, 32.07, 31.07, 29.51, 27.55, 26.19, 25.87, 22.83, 20.96, 14.27.  
1012 **HRMS (ESI):**  $m/z$  calculated for  $\text{C}_{78}\text{H}_{118}\text{O}_4\text{N}_5$   $[\text{M}+\text{H}]^+$  1188.9178 observed 1188.9178.

1013  
1014  
1015  
1016  
1017  
1018  
1019  
1020  
1021  
1022

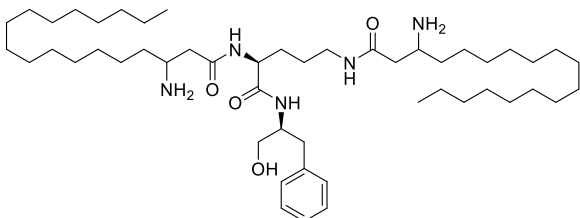

1023 ***N,N'*-5-(((*S*)-1-hydroxy-3-phenylpropan-2-yl)amino)-5-oxopentane-1,4-diyl)bis(3-**  
1024 **aminooctadecanamide) (22):** Compound **21** (1 g, 0.841 mmol) was dissolved in dry MeOH (15  
1025 mL) and transferred into Parr reactor by cannula.  $\text{Pd}(\text{OH})_2$  (10 mol%) and acetic acid(cat.) were  
1026 added. The reactor was closed properly and filled with hydrogen gas (pressure 250 psi). The  
1027 reaction mass was stirred at room temperature for 24 h. After completion of reaction, the reaction  
1028 mixture was filtered through celite pad and concentrated to afford *N,N'*-5-(((*S*)-1-hydroxy-3-  
1029 phenylpropan-2-yl)amino)-5-oxopentane-1,4-diyl)bis(3-aminooctadecanamide) **22** (0.3 g, yield-  
1030 43%) as a colorless sticky oil.<sup>11</sup>

1031 **IR**  $\nu_{\text{max}}$  (thin film): 3406, 3360, 3321, 2924, 1708, 1460, 1082  $\text{cm}^{-1}$ .  
1032  **$^1\text{H}$  NMR (500 MHz,  $\text{CD}_3\text{OD}$ )**  $\delta$  7.28 – 7.18 (m, 5H), 4.33 – 4.24 (m, 1H), 4.16 – 4.08 (m, 1H), 3.52  
1033 (ddd,  $J = 17.5, 12.4, 5.4$  Hz, 2H), 3.27 – 3.09 (m, 4H), 2.97 – 2.87 (m, 1H), 2.74 (ddd,  $J = 22.6,$   
1034 13.5, 8.5 Hz, 1H), 2.50 (dd,  $J = 37.9, 14.6$  Hz, 2H), 2.37 – 2.30 (m, 2H), 1.76 – 1.57 (m, 2H), 1.51  
1035 (d,  $J = 6.4$  Hz, 6H), 1.31 (d,  $J = 18.7$  Hz, 56H), 0.90 (t,  $J = 6.9$  Hz, 6H);  $^{13}\text{C}$  NMR (125 MHz,  $\text{CD}_3\text{OD}$ )  
1036 (characteristic peaks)  $\delta$  173.90, 173.43, 139.83, 130.42, 129.38, 127.37, 64.35, 63.84, 54.76,  
1037 41.73, 41.08, 39.65, 37.95, 36.31, 33.09, 30.66, 26.47, 23.75, 14.49.

1038 **HRMS (ESI):**  $m/z$  calculated for  $\text{C}_{50}\text{H}_{94}\text{O}_4\text{N}_5$   $[\text{M}+\text{H}]^+$  828.7300 observed 828.7305.

1039  
1040  
1041  
1042  
1043  
1044  
1045  
1046  
1047  
1048  
1049  
1050  
1051  
1052  
1053  
1054  
1055  
1056  
1057  
1058  
1059  
1060  
1061

1062  
1063  
1064  
1065  
1066  
1067  
1068  
1069  
1070  
1071  
1072  
1073  
1074  
1075  
1076  
1077  
1078  
1079  
1080  
1081  
1082  
1083  
1084  
1085  
1086  
1087  
1088  
1089  
1090  
1091  
1092

**Supplementary Information References:**

1. Niu, Y. Github: ProGenome.
2. Extract gff/fna/ptt/rnt annotation of Mycobacterium tuberculosis - <https://gist.github.com/viv3kanand/c26615f96975f7c71b8510fb4ac88826>.
3. Krueger, F. Trim Galore. Babraham Bioinforma (2016).
4. Patro, R., Duggal, G., Love, M.I., Irizarry, R.A. and Kingsford, C. Salmon provides fast and bias-aware quantification of transcript expression. Nat. Methods, 10.1038/nmeth.4197 (2017).
5. Love, M.I., Huber, W. and Anders, S. (2014) Moderated estimation of fold change and dispersion for RNA-seq data with DESeq2. Genome Biol., 10.1186/s13059-014-0550-8 (2014).
6. Tjaden, B. A computational system for identifying operons based on RNA-seq data. Methods, 10.1016/j.ymeth.2019.03.026 (2020).
7. Gu, Z., Eils, R. and Schlesner, M. Complex heat maps reveal patterns and correlations in multidimensional genomic data. Bioinformatics, 10.1093/bioinformatics/btw313 (2016).
8. Parish T & Stoker NG, Use of a flexible cassette method to generate a double unmarked Mycobacterium tuberculosis tlyA plcABC mutant by gene replacement. *Microbiology* 146 (Pt 8), 1969-1975 (2000).
9. Kelkar DS, Ravikumar G, Mehendale N, Singh S, Joshi A, Sharma AK, Mhetre A, Rajendran A, Chakrapani H, & Kamat SS, A chemical-genetic screen identifies ABHD12 as an oxidized-phosphatidylserine lipase. *Nat Chem Biol* 15, 169-178 (2019).
10. Khandelwal N, Shaikh M, Mhetre A, Singh S, Sajeewan T, Joshi A, Balaji KN, Chakrapani H, & Kamat SS, Fatty acid chain length drives lysophosphatidylserine-dependent immunological outputs. *Cell Chem Biol* 28, 1169-1179 e1166 (2021).
11. Huang YB, Cai W, Del Rio Flores A, Twigg FF, & Zhang W, Facile Discovery and Quantification of Isonitrile Natural Products via Tetrazine-Based Click Reactions. *Anal Chem* 92, 599-602 (2020).
